# Supplementary material for: Design of Novel Enantiopure Dispirooxindolopyrrolidine-Piperidones as Promising Candidates toward COVID-19: Asymmetric Synthesis, Crystal Structure and In Silico Studies
Source: MDPI journal article supplement (doi:10.3390/molecules27123945), 2022-06-20
Supplement: s1 [file s1]

## Supplementary Materials

# Design of novel enantiopure dispirooxindolopyrrolidine-piperidones as promising candidates toward COVID-19: Asymmetric synthesis, crystal structure and *in silico* studies

Amani Toumi <sup>1</sup>, Sarra Boudriga <sup>1,\*</sup>, Yasmine M. Mandour <sup>2</sup>, Ahmed A. Mekki <sup>2</sup>, Michael Knorr <sup>3</sup>, Carsten Strohmann <sup>4</sup>, Jan-Lukas Kirchhoff <sup>4</sup>, Mansour Sobeh <sup>5,\*</sup>

<sup>1</sup> Laboratory of Heterocyclic Chemistry Natural Product and Reactivity (LR11ES39), Department of Chemistry, Faculty of Science of Monastir, University of Monastir, Monastir 5019, Tunisia; amanitoumi45@gmail.com (A.T.); sarra.boudriga@fsm.rnu.tn (S.B.)

<sup>2</sup> School of Life and Medical Sciences, University of Hertfordshire hosted by Global Academic Foundation, New Administrative Capital, Cairo, Egypt; yasminemandour@yahoo.com (Y.M.M.); ahmed.abdelrasool@gaf.ac (A.A.M.)

<sup>3</sup> Institut UTINAM-UMR CNRS 6213, Université Bourgogne Franche-Comté, 16 Route de Gray, 25030 Besançon, France; michael.knorr@univ-fcomte.fr (M.K.)

<sup>4</sup> Faculty of Chemistry, Inorganic Chemistry, Technische Universität Dortmund, Otto-Hahn-Strasse 6, 44227 Dortmund, Germany; carsten.strohmamm@tu-dortmund.de (C.S.); jan-lukas.kirchhoff@tu-dortmund.de (J.-L.K.)

<sup>5</sup> AgroBioSciences Research, Mohammed VI Polytechnic University, Lot 660–Hay MoulayRachid, Ben Guerir 43150, Morocco; mansour.sobeh@um6p.ma

\* Correspondence: sarra.boudriga@fsm.rnu.tn (S.B.); mansour.sobeh@um6p.ma (M.S.)

## Table of contents

|                                                                                                       | Page   |
|-------------------------------------------------------------------------------------------------------|--------|
| 1. Characterization data of compounds <b>1a-e</b>                                                     | S2     |
| 2. Characterization data of compounds <b>4a-f</b>                                                     | S2-S3  |
| 3. Copies of <sup>1</sup> H- and <sup>13</sup> C-NMR spectra of compounds <b>1a-e</b> and <b>4a-f</b> | S4-S17 |
| 4. <b>Table S1.</b> Selected bond lengths (Å) and angles for compound <b>5c</b> .                     | S18    |
| 5. <b>Table S2.</b> Hydrogen Bonds for <b>5c</b>                                                      | S18    |

## 1. Characterization data of compounds 1a-e

### (*E,E*)-3,5-bis(benzylidene)-*N*-[(*S*)-(-)-methylbenzyl]-4-piperidone 1a.

Pale yellow solid; Yield: (644 mg, 85%); mp ( $^{\circ}\text{C} \pm 2$ ) = 113  $^{\circ}\text{C}$ ;  $[\alpha]_{\text{D}}^{25} = -10.5$  (c 0.20,  $\text{CHCl}_3$ );  $^1\text{H}$  NMR (300 MHz,  $\text{CDCl}_3$ )  $\delta_{\text{H}}$ : 1.35 (d, 3H,  $J = 6.6$  Hz), 3.75 (q, 1H,  $J = 6.6$  Hz), 3.86 (d, 2H,  $J = 15.1$  Hz), 3.95 (d, 2H,  $J = 15.1$  Hz), 7.16–7.42 (m, 15H, Ar-H), 7.83 (s, 2H);  $^{13}\text{C}$  NMR (75 MHz,  $\text{CDCl}_3$ )  $\delta_{\text{C}}$ : 19.3, 51.5, 62.1, 127.3, 127.4, 128.3, 128.5, 128.9, 130.2, 133.6, 135.3, 136.7, 142.4, 188.0; Anal. Calcd for  $\text{C}_{27}\text{H}_{25}\text{NO}$ : C, 85.45; H, 6.64; N, 3.69%.

### (*E,E*)-3,5-bis(*p*-methylbenzylidene)-*N*-[(*S*)-(-)-methylbenzyl]-4-piperidone 1b.

Yellow solid; Yield: (640 mg, 81%); mp ( $^{\circ}\text{C} \pm 2$ ) = 104  $^{\circ}\text{C}$ ;  $[\alpha]_{\text{D}}^{25} = -13.0$  (c 0.20,  $\text{CHCl}_3$ );  $^1\text{H}$  NMR (300 MHz,  $\text{CDCl}_3$ )  $\delta_{\text{H}}$ : 1.38 (d, 3H,  $J = 6.3$  Hz), 2.39 (s, 3H), 2.41 (s, 3H), 3.72 (q, 1H,  $J = 6.6$  Hz), 3.85 (d, 2H,  $J = 15.3$  Hz), 3.92 (d, 2H,  $J = 15.3$  Hz), 7.21–7.34 (m, 9H, Ar-H), 7.54 (d, 4H,  $J = 7.8$  Hz), 7.77 (s, 2H);  $^{13}\text{C}$  NMR (75 MHz,  $\text{CDCl}_3$ )  $\delta_{\text{C}}$ : 19.4, 21.1, 51.6, 62.1, 124.1, 127.0, 127.9, 128.8, 129.2, 129.8, 131.6, 140.5, 142.7, 188.2. Anal. Calcd for  $\text{C}_{29}\text{H}_{29}\text{NO}$ : C, 85.47; H, 7.17; N, 3.44%. Found: C, 85.51; H, 7.20; N, 3.43%.

### (*E,E*)-3,5-bis(*p*-methoxybenzylidene)-*N*-[(*S*)-(-)-methylbenzyl]-4-piperidone 1c.

Yellow solid; Yield: (800 mg, 93%); mp ( $^{\circ}\text{C} \pm 2$ ) = 109  $^{\circ}\text{C}$ ;  $[\alpha]_{\text{D}}^{25} = -17.0$  (c 0.20,  $\text{CHCl}_3$ );  $^1\text{H}$  NMR (300 MHz,  $\text{CDCl}_3$ )  $\delta_{\text{H}}$ : 1.38 (d, 3H,  $J = 6.6$  Hz), 3.75–3.94 (m, 11H), 6.88–6.93 (m, 2H), 7.19–7.34 (m, 11H, Ar-H), 7.81 (s, 2H);  $^{13}\text{C}$  NMR (75 MHz,  $\text{CDCl}_3$ )  $\delta_{\text{C}}$ : 19.4, 51.5, 62.2, 115.5, 115.8, 127.3, 127.3, 128.3, 131.4, 132.0, 132.1, 133.3, 135.4, 142.6, 188.3. Anal. Calcd for  $\text{C}_{29}\text{H}_{29}\text{NO}_3$ : C, 79.24; H, 6.65; N, 3.19%. Found: C, 79.22; H, 6.63; N, 3.22%.

### (*E,E*)-3,5-bis(*p*-chlorobenzylidene)-*N*-[(*S*)-(-)-methylbenzyl]-4-piperidone 1d.

Yellow solid; Yield: (789 mg, 88%); mp ( $^{\circ}\text{C} \pm 2$ ) = 140  $^{\circ}\text{C}$ ;  $[\alpha]_{\text{D}}^{25} = -21.0$  (c 0.20,  $\text{CHCl}_3$ );  $^1\text{H}$  NMR (300 MHz,  $\text{CDCl}_3$ )  $\delta_{\text{H}}$ : 1.38 (d, 3H,  $J = 6.6$  Hz), 3.73 (q, 1H,  $J = 6.8$  Hz), 3.80 (d, 2H,  $J = 15.1$  Hz), 3.87 (d, 2H,  $J = 15.1$  Hz), 7.21–7.31 (m, 8H, Ar-H), 7.33–7.36 (m, 5H, Ar-H), 7.74 (s, 2H);  $^{13}\text{C}$  NMR (75 MHz,  $\text{CDCl}_3$ )  $\delta_{\text{C}}$ : 18.9, 50.9, 61.6, 122.8, 126.9, 127.9, 131.1, 131.3, 133.5, 134.9, 134.9, 141.8, 187.3. Anal. Calcd for  $\text{C}_{27}\text{H}_{23}\text{Cl}_2\text{NO}$ : C, 72.32; H, 5.17; N, 3.12%. Found: C, 72.30; H, 5.20; N, 3.15%.

### (*E,E*)-3,5-bis(*p*-nitrobenzylidene)-*N*-[(*S*)-(-)-methylbenzyl]-4-piperidone 1e.

Yellow solid; Yield: (0.78g, 85%); mp ( $^{\circ}\text{C} \pm 2$ ) = 120  $^{\circ}\text{C}$ ;  $[\alpha]_{\text{D}}^{25} = -25.0$  (c 0.20,  $\text{CHCl}_3$ );  $^1\text{H}$  NMR (300 MHz,  $\text{CDCl}_3$ )  $\delta_{\text{H}}$ : 1.34 (d, 3H,  $J = 6.6$  Hz), 3.73 (q, 1H,  $J = 6.8$  Hz), 3.80–3.91 (m, 4H), 7.14–7.32 (m, 7H, Ar-H), 7.40–7.44 (m, 4H, Ar-H), 8.21 (s, 2H), 8.22 (d, 2H,  $J = 8.7$  Hz, Ar-H);  $^{13}\text{C}$  NMR (75 MHz,  $\text{CDCl}_3$ )  $\delta_{\text{C}}$ : 18.7, 50.8, 61.8, 123.2, 126.8, 127.1, 128.0, 130.1, 133.7, 135.8, 140.9, 141.6, 147.0, 186.7. Anal. Calcd for  $\text{C}_{27}\text{H}_{23}\text{N}_3\text{O}_5$ : C, 69.07; H, 4.94; N, 8.95%. Found: C, 69.10; H, 4.91; N, 8.97%.

## 2. Characterization data of compounds 4a-f

### Ethyl (2*R*, 3*R*, 4*S*, 5*S*)-3'-((*E*)-benzylidene)-2',4'-dioxo-4-phenyl-1'-((*S*)-1-phenylethyl) dispiro [indoline-3',2-pyrrolidine-3,5"-piperidine]-5-carboxylate (4a)

Yellow solid; Yield: (501 mg, 82%); mp ( $^{\circ}\text{C} \pm 2$ ) = 175  $^{\circ}\text{C}$ ;  $[\alpha]_{\text{D}}^{25} = -157.0$  (c 0.20,  $\text{CHCl}_3$ );  $^1\text{H}$  NMR (300 MHz,  $\text{DMSO}-d_6$ )  $\delta_{\text{H}}$ : 1.04 (t,  $J = 6.9$  Hz, 3H), 1.21 (d,  $J = 6.6$  Hz, 3H), 2.57–2.61 (m, 1H), 2.95–3.02 (m, 2H), 3.52–3.63 (m, 1H), 3.74–3.79 (m, 1H), 3.93–4.02 (m, 2H), 4.49 (d,  $J = 10.2$  Hz, 1H), 4.97 (d,  $J = 10.5$  Hz, 1H), 6.74–6.90 (m, 2H, Ar-H), 6.95–7.00 (m, 5H, Ar-H), 7.02–7.28 (m, 10H, Ar-H), 7.32–7.37 (m, 3H, Ar-H + 1H<sub>ethylenic</sub>);  $^{13}\text{C}$  NMR (75 MHz,  $\text{DMSO}-d_6$ )  $\delta_{\text{C}}$ : 13.9, 19.9, 50.1, 53.0, 54.0, 59.7, 62.0, 63.6, 64.4, 73.2, 121.1, 126.7, 126.8, 127.1, 127.4, 127.8, 127.9, 128.5, 128.6, 129.2, 130.2, 130.3, 130.4, 133.9, 134.1, 134.2, 135.8, 135.9, 136.7, 137.0, 140.7, 143.3, 172.4, 178.3, 196.9; Anal. Calcd for  $\text{C}_{39}\text{H}_{37}\text{N}_3\text{O}_4$ : C, 76.57; H, 6.10; N, 6.87%. Found: C, 76.60; H, 6.12; N, 6.83%.

### Ethyl (2*R*, 3*R*, 4*S*, 5*S*)-3'-((*E*)-*p*-methylbenzylidene)-2',4'-dioxo-4-(*p*-methylphenyl)-1'-((*S*)-1-phenylethyl) dispiro [indoline-3',2-pyrrolidine-3,5"-piperidine]-5-carboxylate (4b)

Yellow solid; Yield: (492 mg, 77%); mp ( $^{\circ}\text{C} \pm 2$ ) = 199  $^{\circ}\text{C}$ ;  $[\alpha]_{\text{D}}^{25} = -133.0$  (c 0.20,  $\text{CHCl}_3$ );  $^1\text{H}$  NMR (300 MHz,  $\text{CDCl}_3$ )  $\delta_{\text{H}}$ : 1.09 (t,  $J = 6.9$  Hz, 3H), 1.27 (d,  $J = 7.8$  Hz, 3H), 1.76 (d,  $J = 12.9$  Hz, 1H), 2.33 (s, 3H), 2.37 (s, 3H), 2.71 (d,  $J = 14.4$  Hz, 1H), 3.18–3.39 (m, 1H), 3.44–3.68 (m, 1H), 4.07–4.18 (m, 2H), 4.56 (d,  $J = 10.2$  Hz, 1H), 4.96 (d,  $J = 10.2$  Hz, 1H), 6.71–6.90 (m, 1H, Ar-H), 6.94–7.10 (m, 9H, Ar-H), 7.13–7.28 (m, 6H, Ar-H), 7.38–7.45 (m, 2H, Ar-H + 1H<sub>ethylenic</sub>), 7.96 (bs, 1H);  $^{13}\text{C}$  NMR (75 MHz,  $\text{CDCl}_3$ )  $\delta_{\text{C}}$ : 13.5, 17.5, 20.6, 20.8, 49.7, 53.9, 55.3, 56.5, 60.4, 63.7, 65.9, 72.8, 108.6, 121.7, 121.8, 126.0, 126.1, 126.3, 126.5, 127.1, 127.2, 127.4, 128.3, 129.1, 129.6, 130.2, 131.7, 133.3, 136.1, 137.1, 138.7, 140.9, 171.6, 178.4, 198.8; Anal. Calcd. for  $\text{C}_{41}\text{H}_{41}\text{N}_3\text{O}_4$ : C, 76.97; H, 6.46; N, 6.57%. Found: C, 76.95; H, 6.49; N, 6.58%.

### Ethyl (2*R*, 3*R*, 4*S*, 5*S*)-3'-((*E*)-*p*-methoxybenzylidene)-2',4'-dioxo-4-(*p*-methoxyphenyl)-1'-((*S*)-1-phenylethyl) dispiro [indoline-3',2-pyrrolidine-3,5"-piperidine]-5-carboxylate (4c)

dark orange crystals; Yield: (569 mg, 85%); mp ( $^{\circ}\text{C} \pm 2$ ) = 168  $^{\circ}\text{C}$ ;  $[\alpha]_{\text{D}}^{25} = -125.0$  (c 0.20,  $\text{CHCl}_3$ );  $^1\text{H}$  NMR (300MHz,  $\text{CDCl}_3$ )  $\delta_{\text{H}}$ : 1.11 (t,  $J = 7.1$  Hz, 3H), 1.25 (d,  $J = 6.6$  Hz, 3H), 1.80 (d,  $J = 12.6$  Hz, 1H), 2.37 (d,  $J = 12.6$  Hz, 1H), 2.74 (d,  $J = 13.8$  Hz, 1H), 3.16–3.20 (m, 1H), 3.34–3.62 (m, 1H), 3.78–3.83 (m, 6H), 4.05–4.24 (m, 2H), 4.53 (d,  $J = 10.2$  Hz, 1H), 4.94 (d,  $J = 10.2$  Hz, 1H), 6.69–7.09 (m, 10H, Ar-H), 7.12–7.16 (m, 6H, Ar-H), 7.19–7.28 (m, 2H, Ar-H), 7.44–7.51 (m, 2H, Ar-H + 1H<sub>ethylenic</sub>), 8.15 (bs, 1H);  $^{13}\text{C}$  NMR (75 MHz,  $\text{CDCl}_3$ )  $\delta_{\text{C}}$ : 13.3, 18.7, 49.6, 51.6, 53.2, 54.4, 56.0, 60.4, 61.8, 63.5, 64.0, 73.0; 109.3, 113.4,

114.0, 120.9, 120.9, 125.4, 127.0, 127.9, 128.7, 129.3, 130.1, 130.6, 132.2, 136.7, 140.2, 141.2, 142.7, 158.2, 160.1, 171.8, 178.4, 198.7; Anal. Calcd for C<sub>41</sub>H<sub>41</sub>N<sub>3</sub>O<sub>6</sub>: C, 73.30; H, 6.15; N, 6.26%. Found: C, 73.28; H, 6.11; N, 6.28%.

**Ethyl (2R, 3R, 4S, 5S)-3'-((E)-p-chlorobenzylidene)-2',4''-dioxo-4-(p-chlorophenyl)-1'-((S)-1-phenylethyl) dispiro [indoline-3',2-pyrrolidine-3,5''-piperidine]-5-carboxylate (4d)**

Yellow solid; Yield: (511 mg, 75%); mp (°C ± 2) = 209°C;  $[\alpha]_D^{25} = -110.0$  (c 0.20, CHCl<sub>3</sub>); <sup>1</sup>H NMR (300 MHz, DMSO-*d*<sub>6</sub>) δ<sub>H</sub>: 1.03 (t, *J* = 7.1 Hz, 3H), 1.18 (d, *J* = 6.6 Hz, 3H), 2.66 (d, *J* = 12.6 Hz, 1H), 3.00–3.24 (m, 2H), 3.27–3.28 (m, 1H), 3.48–3.57 (m, 1H), 3.98–4.07 (m, 2H), 4.46 (d, *J* = 10.5 Hz, 1H), 4.88 (d, *J* = 10.5 Hz, 1H), 6.70–6.79 (m, 1H, Ar-H), 6.82–6.93 (m, 2H, Ar-H), 6.94–7.19 (m, 15H, Ar-H), 7.30–7.35 (m, 1H); <sup>13</sup>C NMR (75 MHz, DMSO-*d*<sub>6</sub>) δ<sub>C</sub>: 13.9, 18.8, 49.3, 51.5, 54.2, 60.3, 61.5, 63.1, 64.2, 72.5, 109.0, 109.2, 127.2, 127.6, 127.7, 127.8, 128.7, 129.1, 129.3, 129.6, 130.1, 130.2, 131.6, 132.4, 134.3, 136.0, 139.1, 140.2, 142.7, 142.9, 171.6, 178.2, 198.6; Anal. Calcd for C<sub>39</sub>H<sub>35</sub>Cl<sub>2</sub>N<sub>3</sub>O<sub>4</sub>: C, 68.82; H, 5.18; N, 6.17%. Found: C, 68.78; H, 5.20; N, 6.19%.

**Ethyl (2R, 3R, 4S, 5S)-3'-((E)-p-nitrobenzylidene)-2',4''-dioxo-4-(p-nitrophenyl)-1'-((S)-1-phenylethyl) dispiro [indoline-3',2-pyrrolidine-3,5''-piperidine]-5-carboxylate (4e)**

Yellow solid; Yield: (559 mg, 80%); mp (°C ± 2) = 192 °C;  $[\alpha]_D^{25} = -117.0$  (c 0.20, CHCl<sub>3</sub>); <sup>1</sup>H NMR (300 MHz, CDCl<sub>3</sub>) δ<sub>H</sub>: 1.14 (t, *J* = 7.2 Hz, 3H), 1.27 (d, *J* = 6.6 Hz, 3H), 2.74 (t, *J* = 12.3 Hz, 1H), 3.00–3.23 (m, 2H), 3.35–3.37 (m, 1H), 3.55–3.58 (m, 1H), 4.06–4.22 (m, 2H), 4.77 (d, *J* = 9.6 Hz, 1H), 5.08 (d, *J* = 9.6 Hz, 1H), 6.74–6.93 (m, 4H, Ar-H), 7.04–7.24 (m, 7H, Ar-H), 7.42–7.59 (m, 1H, Ar-H), 7.61–7.64 (m, 2H), 8.04–8.10 (m, 2H), 8.14–8.18 (m, 2H); <sup>13</sup>C NMR (75 MHz, CDCl<sub>3</sub>) δ<sub>C</sub>: 13.6, 17.8, 52.6, 54.0, 60.8, 62.8, 63.5, 63.9, 64.7, 73.4, 109.7, 122.2, 122.8, 122.9, 123.1, 123.1, 126.5, 126.8, 127.7, 127.8, 129.0, 130.1, 130.1, 131.0, 134.4, 140.3, 141.2, 146.7, 147.0, 171.3, 178.1, 198.6; Anal. Calcd for C<sub>39</sub>H<sub>35</sub>N<sub>5</sub>O<sub>8</sub>: C, 66.75; H, 5.03; N, 9.98%. Found: C, 66.77; H, 5.05; N, 10.00%.

**Methyl (2R, 3R, 4S, 5S)-3'-((E)-p-methylbenzylidene)-2',4''-dioxo-4-(p-methylphenyl)-1'-((S)-1-phenylethyl) dispiro [indoline-3',2-pyrrolidine-3,5''-piperidine]-5-carboxylate (4f)**

Yellow solid; Yield: (474 mg, 72%); mp (°C ± 2) = 200 °C;  $[\alpha]_D^{25} = -165.0$  (c 0.20, CHCl<sub>3</sub>); <sup>1</sup>H NMR (300 MHz, DMSO-*d*<sub>6</sub>) δ<sub>H</sub>: 1.07 (d, *J* = 6.6 Hz, 3H), 2.72 (d, *J* = 6.0 Hz, 1H), 3.16 (d, *J* = 12.6 Hz, 1H), 3.26 (d, *J* = 12.6 Hz, 1H), 3.49–3.51 (m, 1H), 3.64 (d, *J* = 12 Hz, 1H), 3.73 (s, 3H), 3.80 (s, 3H), 3.81 (s, 3H), 4.81 (d, *J* = 10.5 Hz, 1H), 4.95 (d, *J* = 10.5 Hz, 1H), 6.74–7.00 (m, 4H, Ar-H), 7.02–7.28 (m, 14H, Ar-H), 7.32–7.37 (m, 1H); <sup>13</sup>C NMR (75 MHz, DMSO-*d*<sub>6</sub>) δ<sub>C</sub>: 17.3, 49.0, 51.0, 53.5, 53.9, 54.8, 59.4, 61.6, 62.8, 63.4, 72.6, 108.4, 121.7, 121.8, 126.4, 126.6, 127.0, 127.2, 127.4, 127.7, 127.9, 129.2, 129.3, 129.4, 129.5, 132.8, 134.7, 136.1, 136.3, 137.1, 137.3, 139.0, 141.4, 141.5, 171.8, 177.4, 197.4; Anal. Calcd for C<sub>40</sub>H<sub>39</sub>N<sub>3</sub>O<sub>6</sub>: C, 73.04; H, 5.98; N, 6.39%. Found: C, 73.06; H, 5.95; N, 6.42%.

### 3. Copies of $^1\text{H}$ - and $^{13}\text{C}$ -NMR spectra of compounds 1a-e and 4a-f

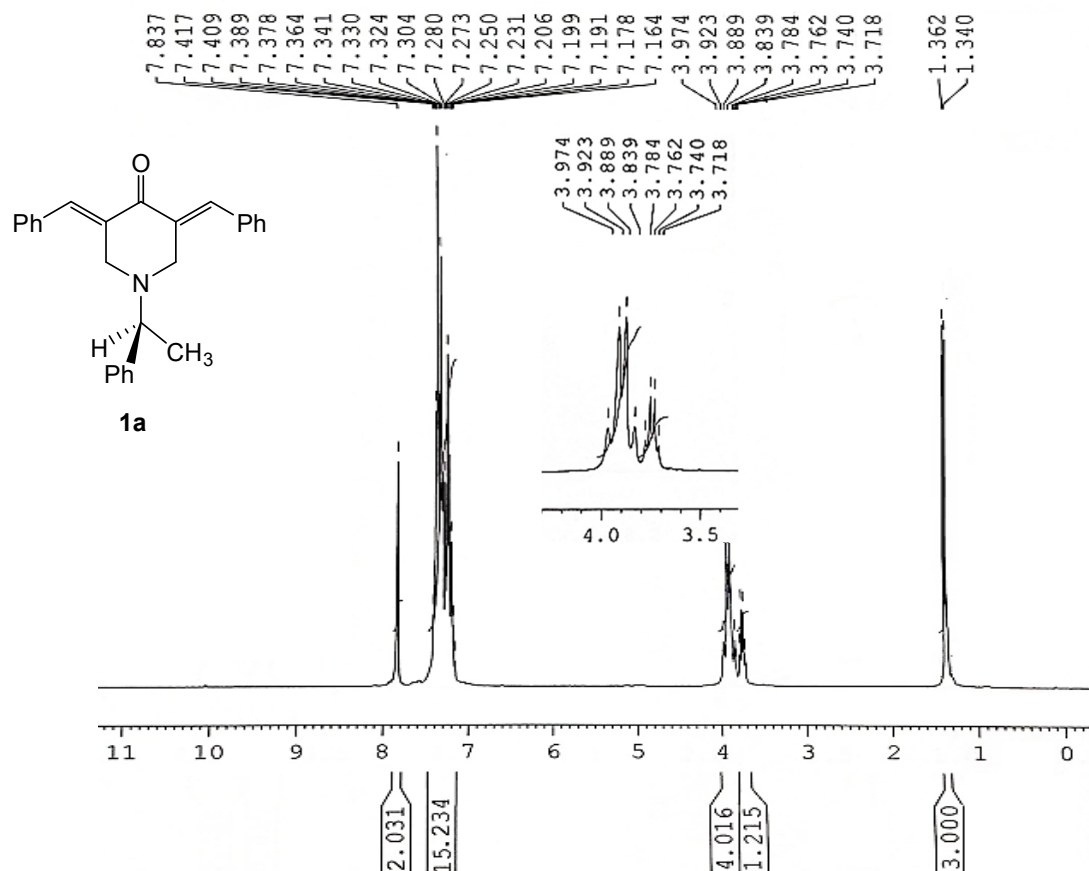

**Figure S1.**  $^1\text{H}$  NMR spectrum of compound **1a** (300 MHz,  $\text{CDCl}_3$ )

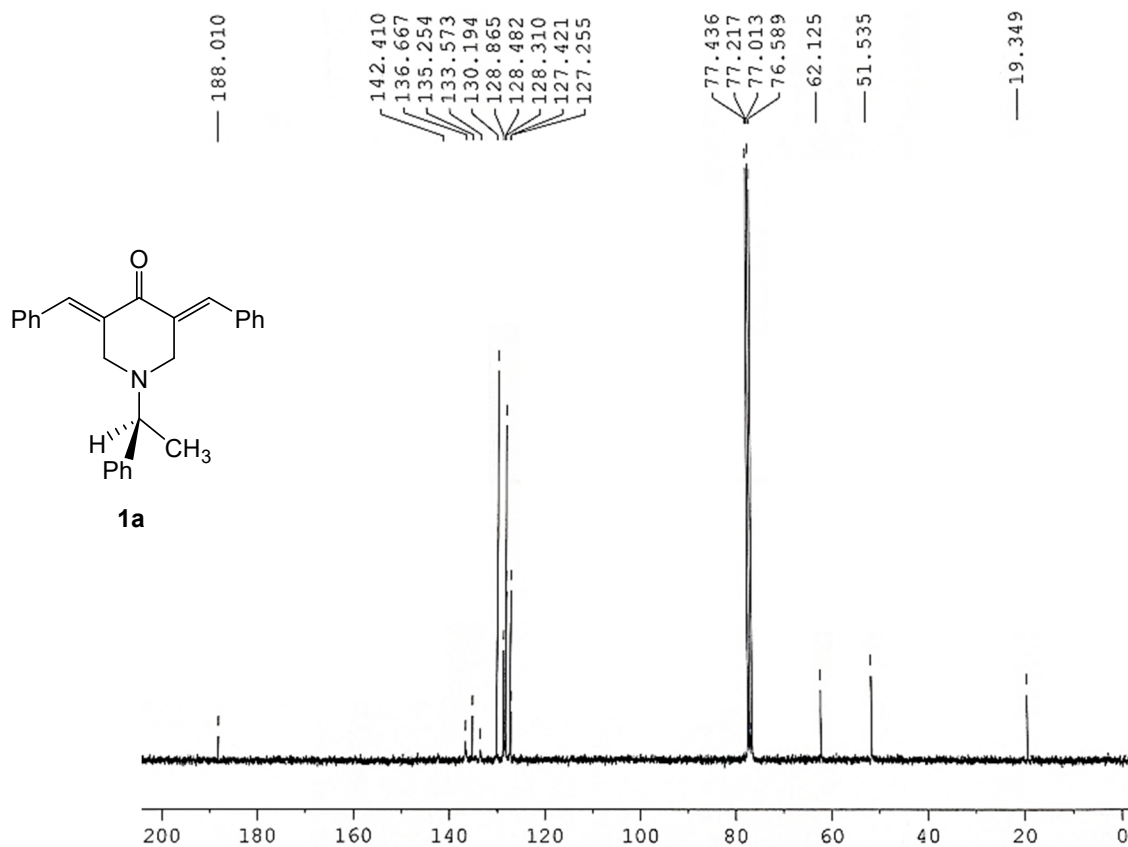

**Figure S2.**  $^{13}\text{C}$  { $^1\text{H}$ } NMR spectrum of compound **1a** (75 MHz,  $\text{CDCl}_3$ )

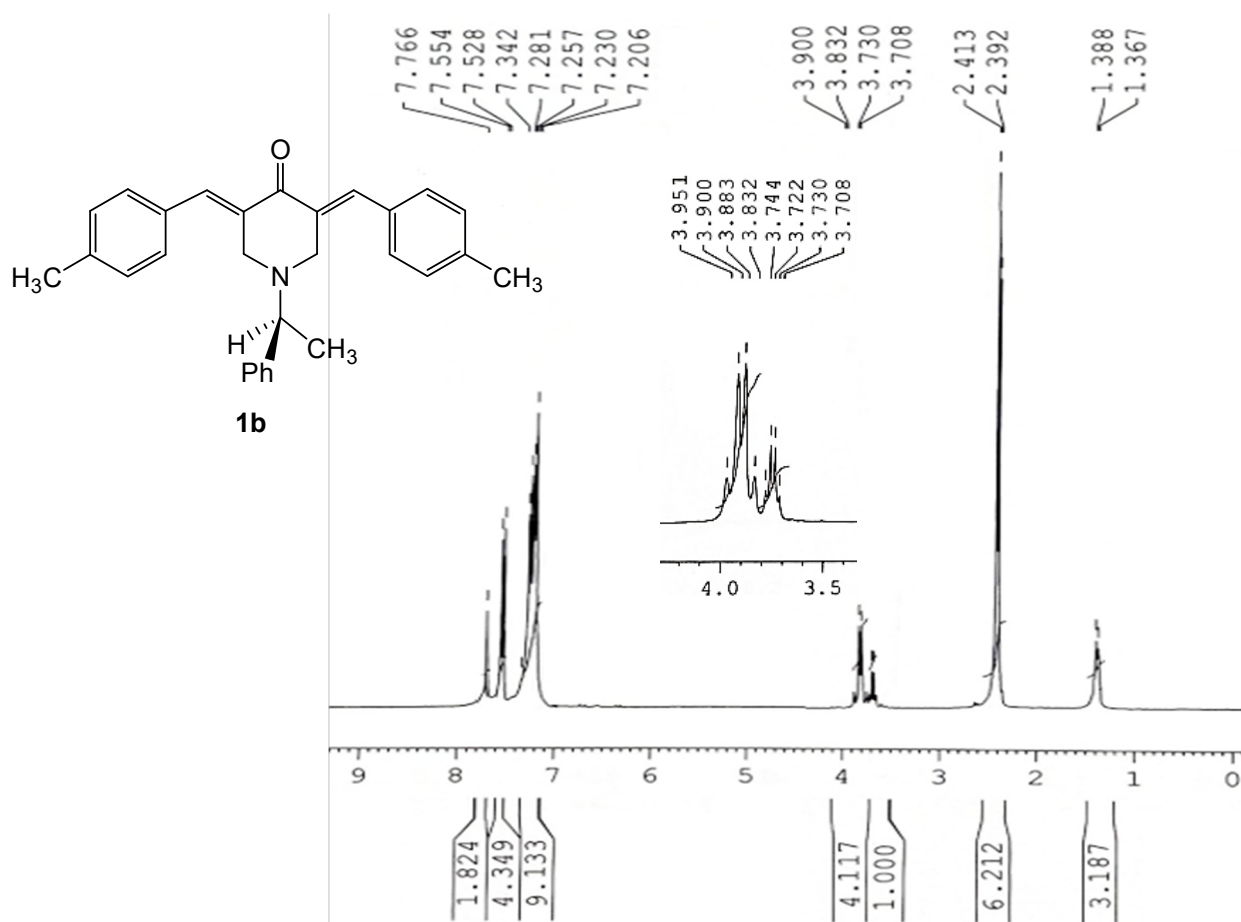

**Figure S3.**  $^1\text{H}$  NMR spectrum of compound **1b** (300 MHz,  $\text{CDCl}_3$ )

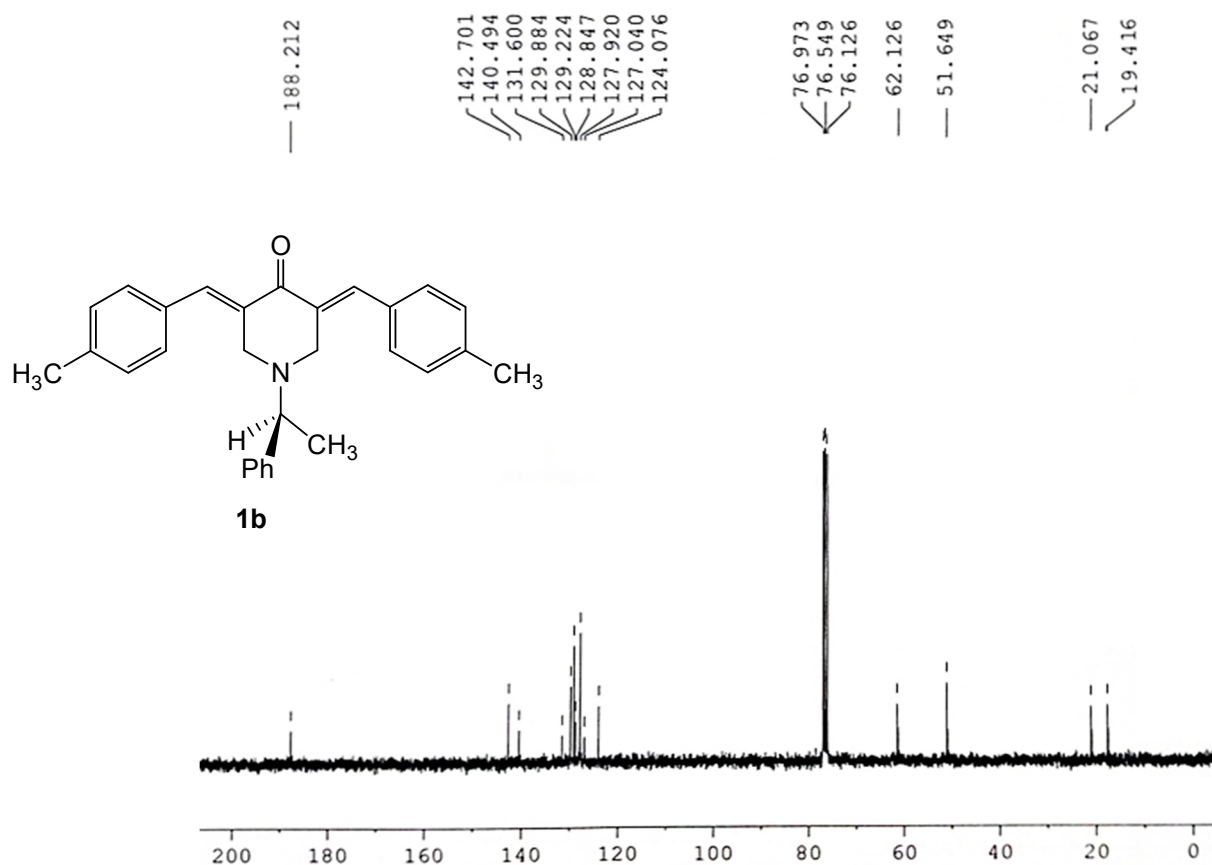

Figure S4. <sup>13</sup>C {<sup>1</sup>H} NMR spectrum of compound **1b** (75 MHz, CDCl<sub>3</sub>)

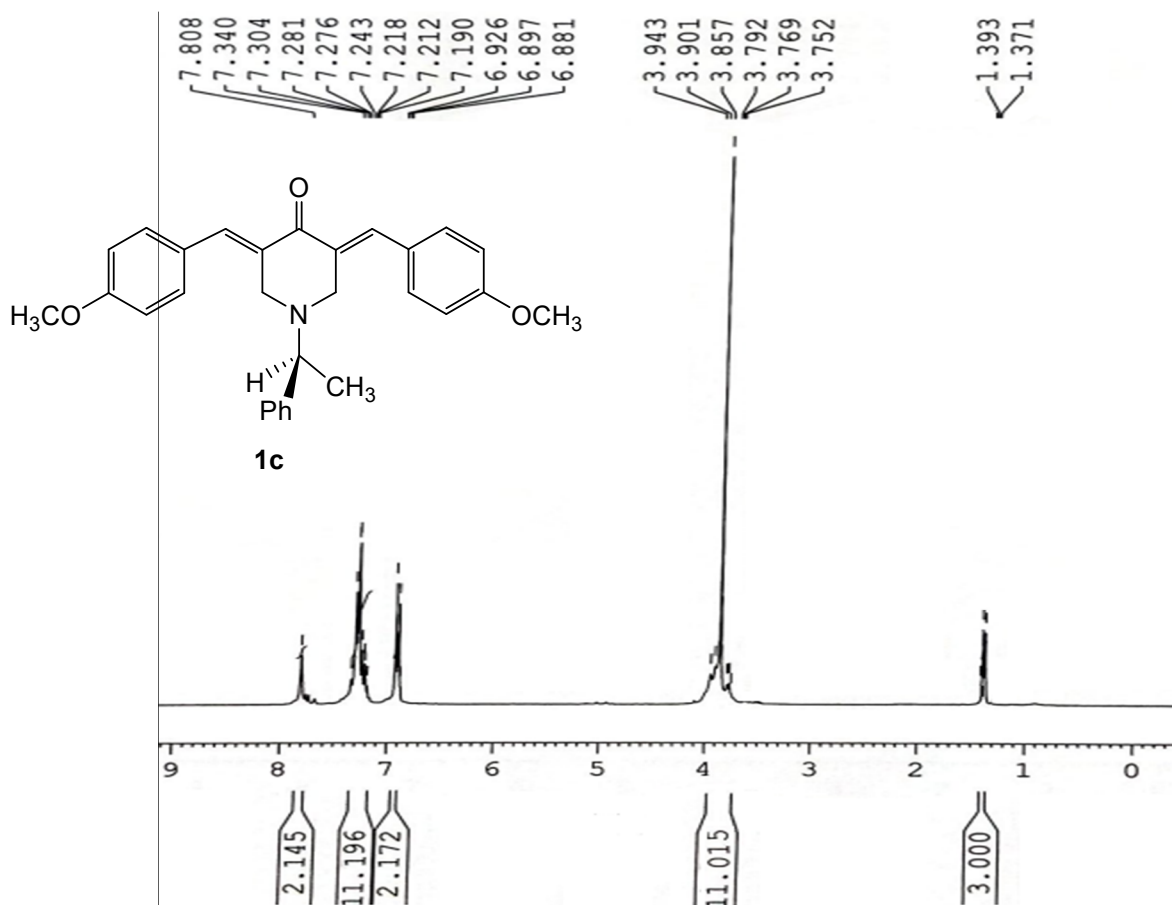

Figure S5. <sup>1</sup>H NMR spectrum of compound **1c** (300 MHz, CDCl<sub>3</sub>)

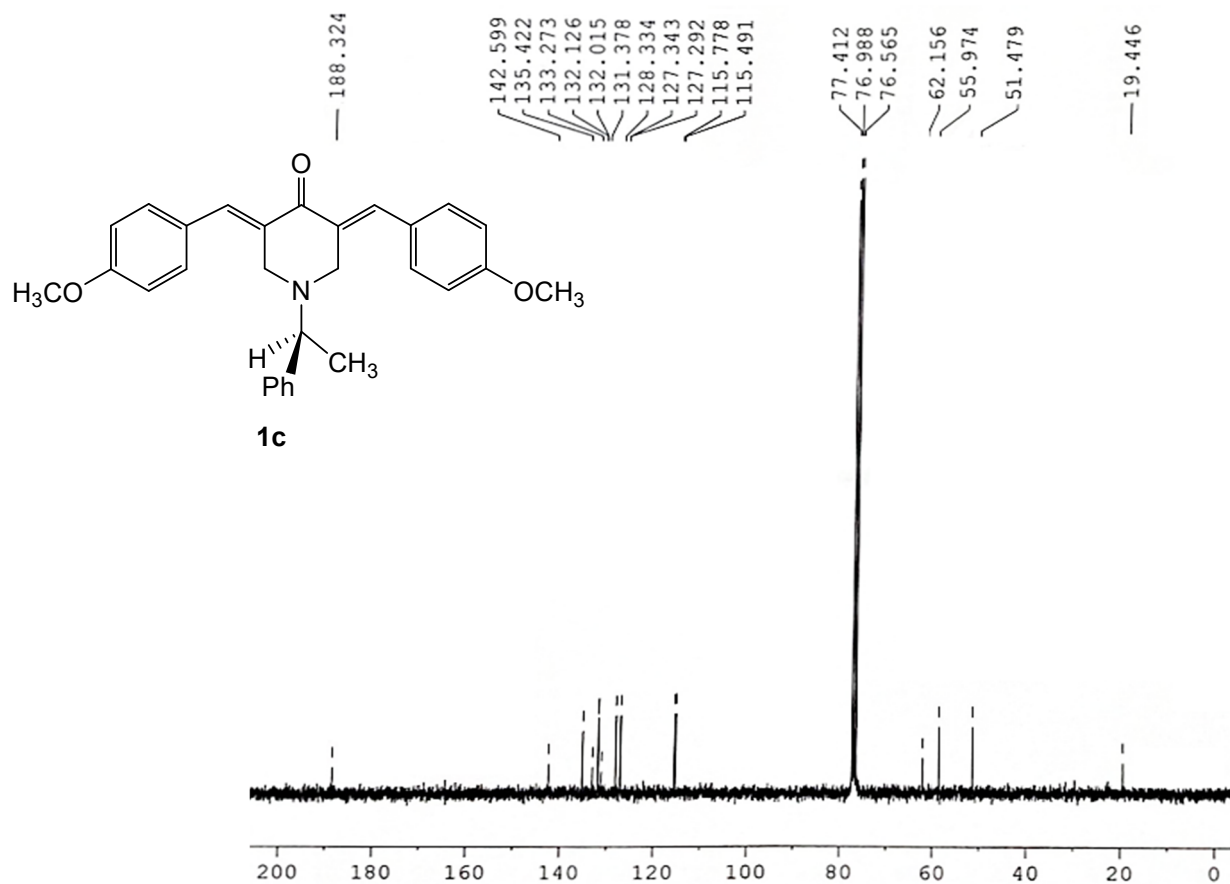

Figure S6. <sup>13</sup>C {<sup>1</sup>H} NMR spectrum of compound **1c** (75 MHz, CDCl<sub>3</sub>)

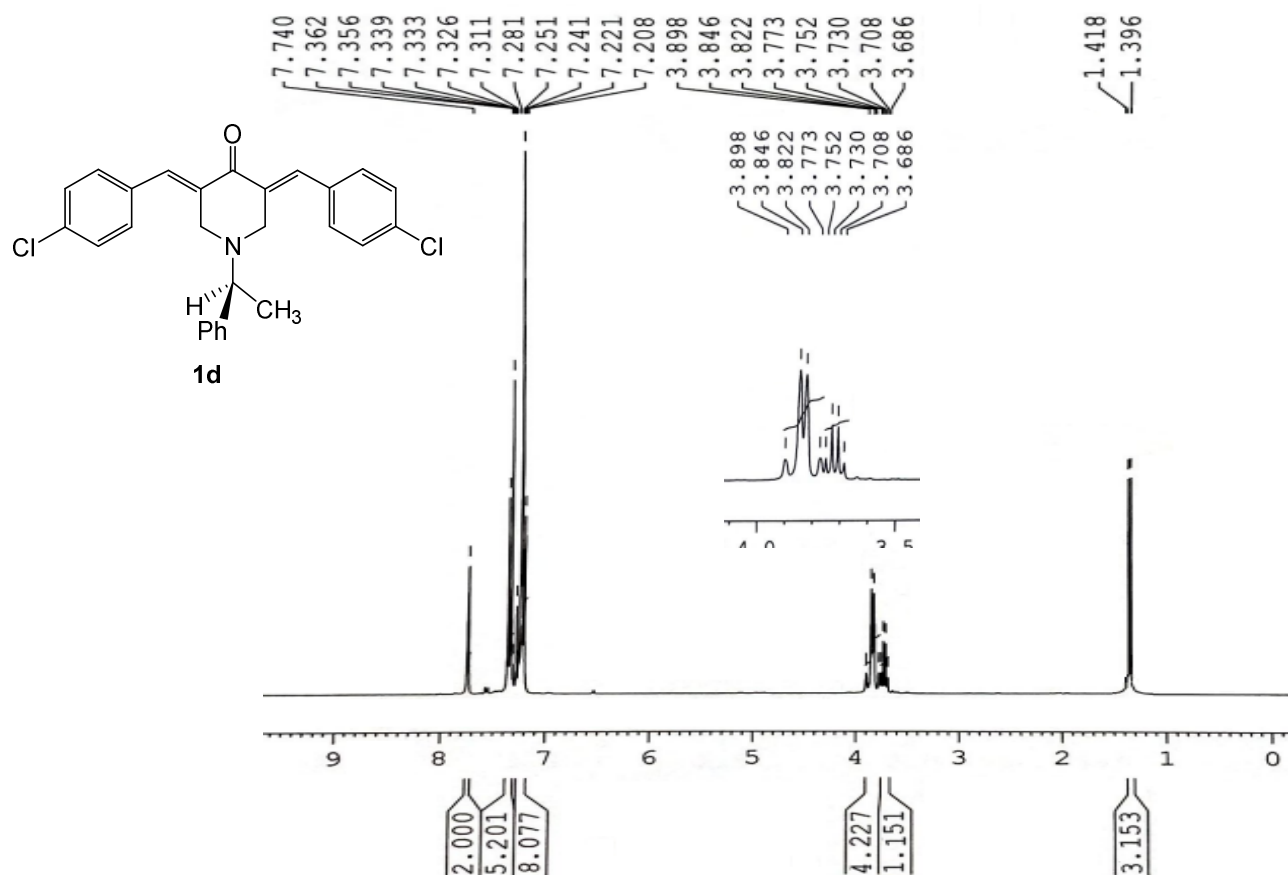

**Figure S7.**  $^1\text{H}$  NMR spectrum of compound **1d** (300 MHz,  $\text{CDCl}_3$ )

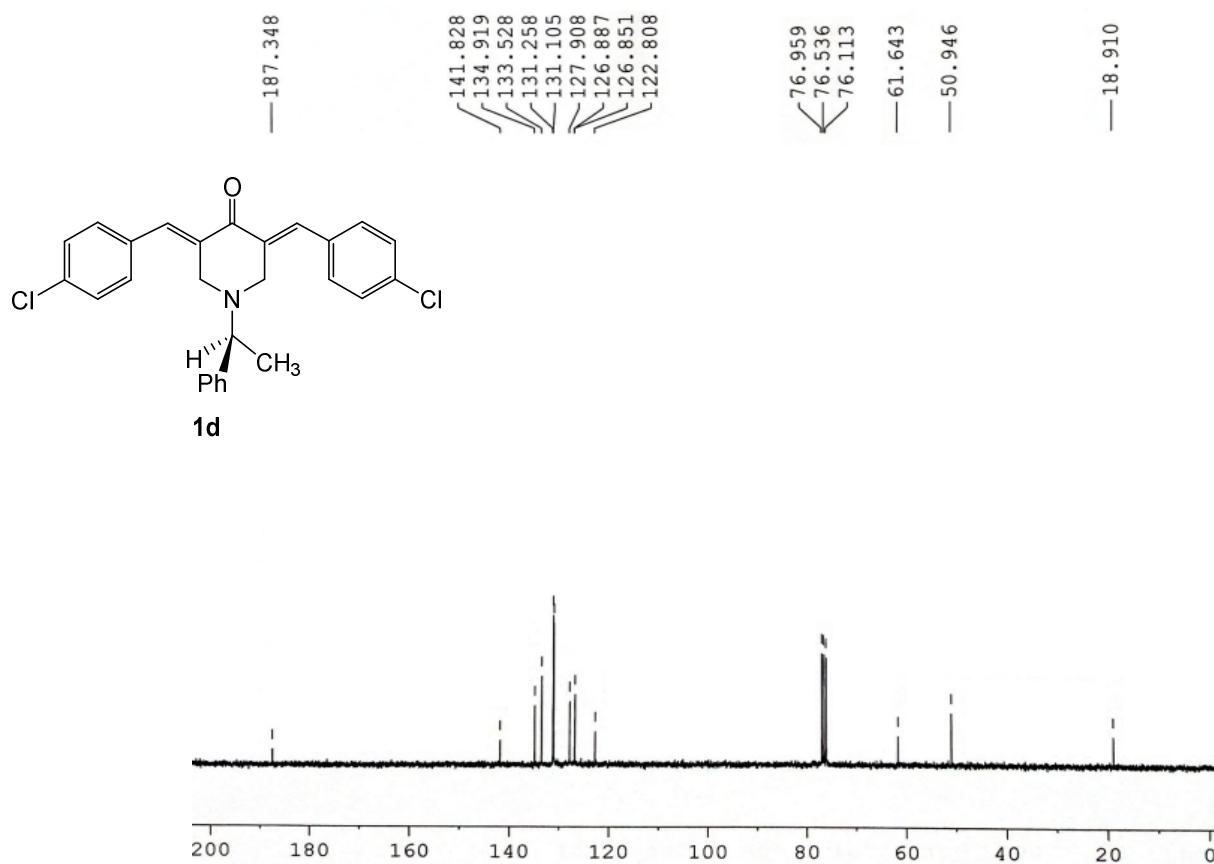

**Figure S8.**  $^{13}\text{C}$  { $^1\text{H}$ } NMR spectrum of compound **1d** (75 MHz,  $\text{CDCl}_3$ )

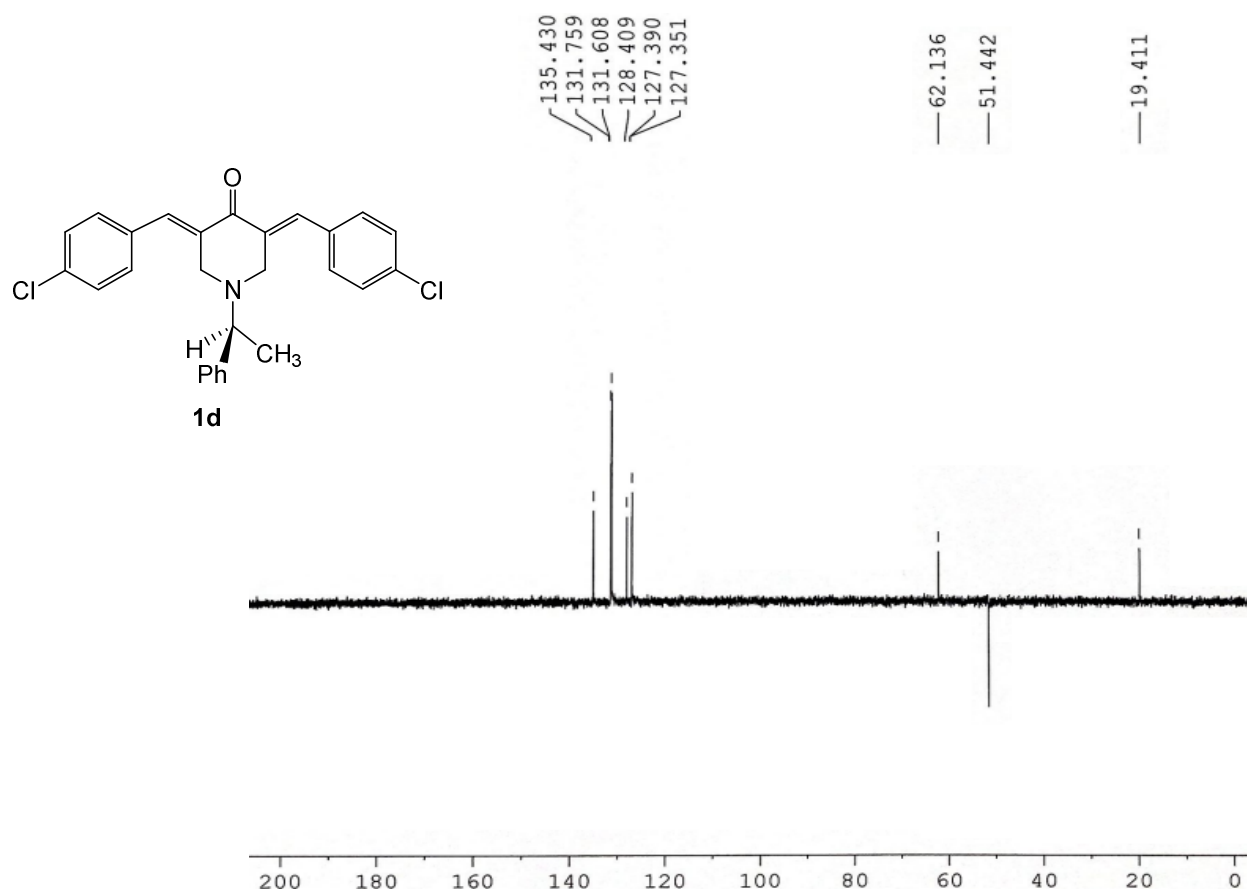

Figure S9. DEPT-135 spectrum of compound **1d** (75 MHz, CDCl<sub>3</sub>)

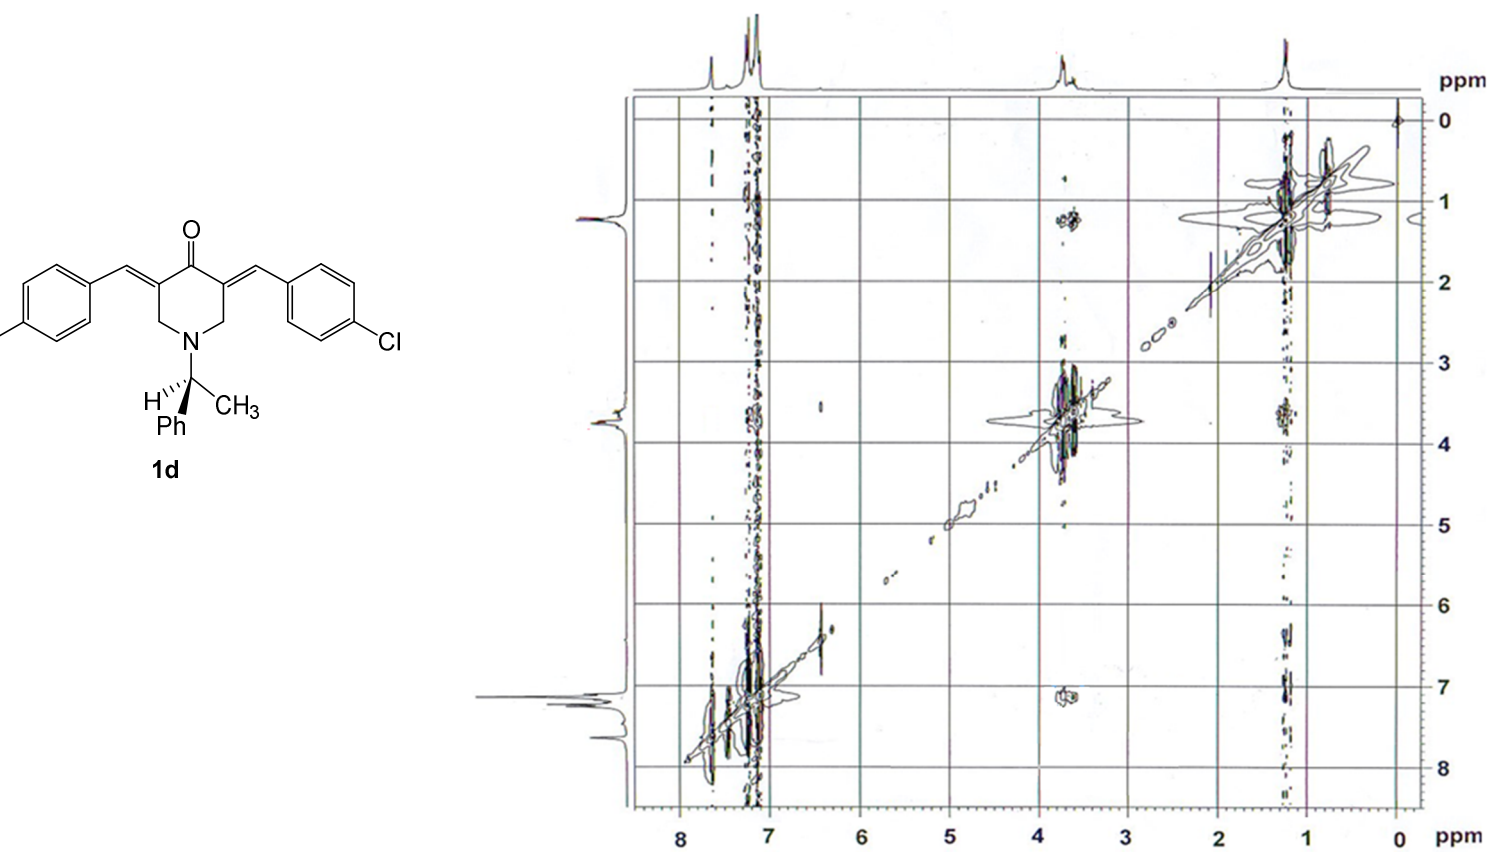

**Figure S10.** NOESY spectrum of compound **1d** (300 MHz, CDCl<sub>3</sub>)

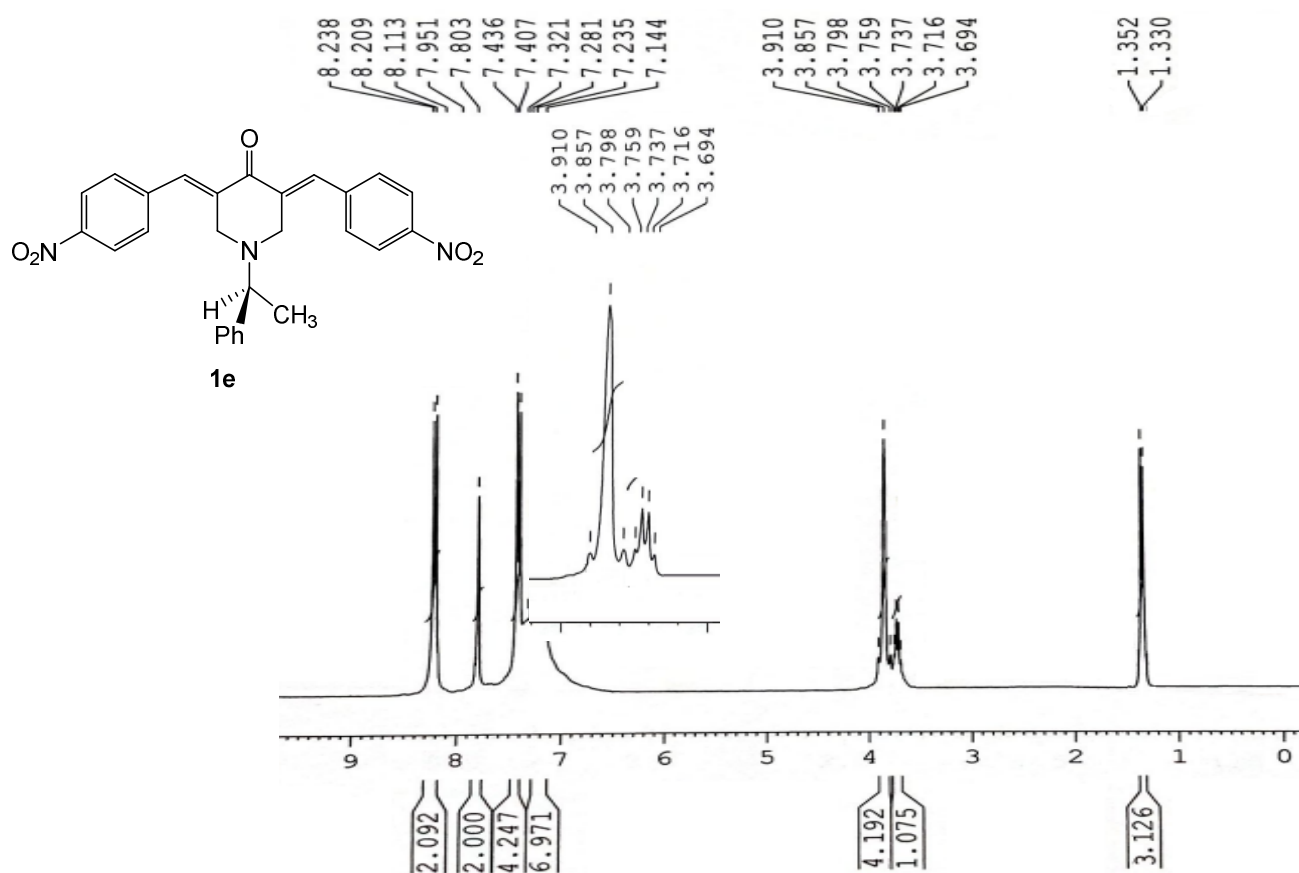

**Figure S11.** <sup>1</sup>H NMR spectrum of compound **1e** (300 MHz, CDCl<sub>3</sub>)

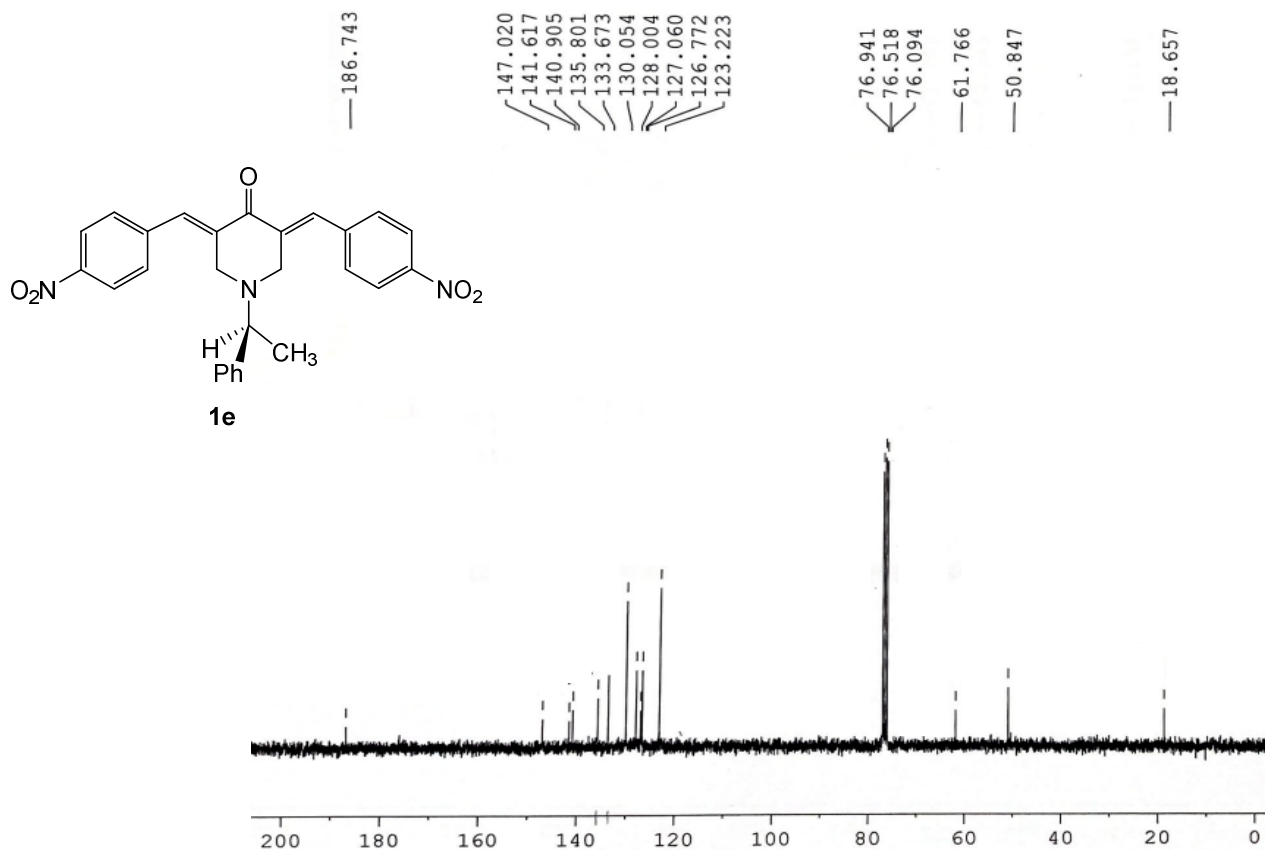

**Figure S12.**  $^{13}\text{C}$   $\{^1\text{H}\}$  NMR spectrum of compound **1e** (75 MHz,  $\text{CDCl}_3$ )

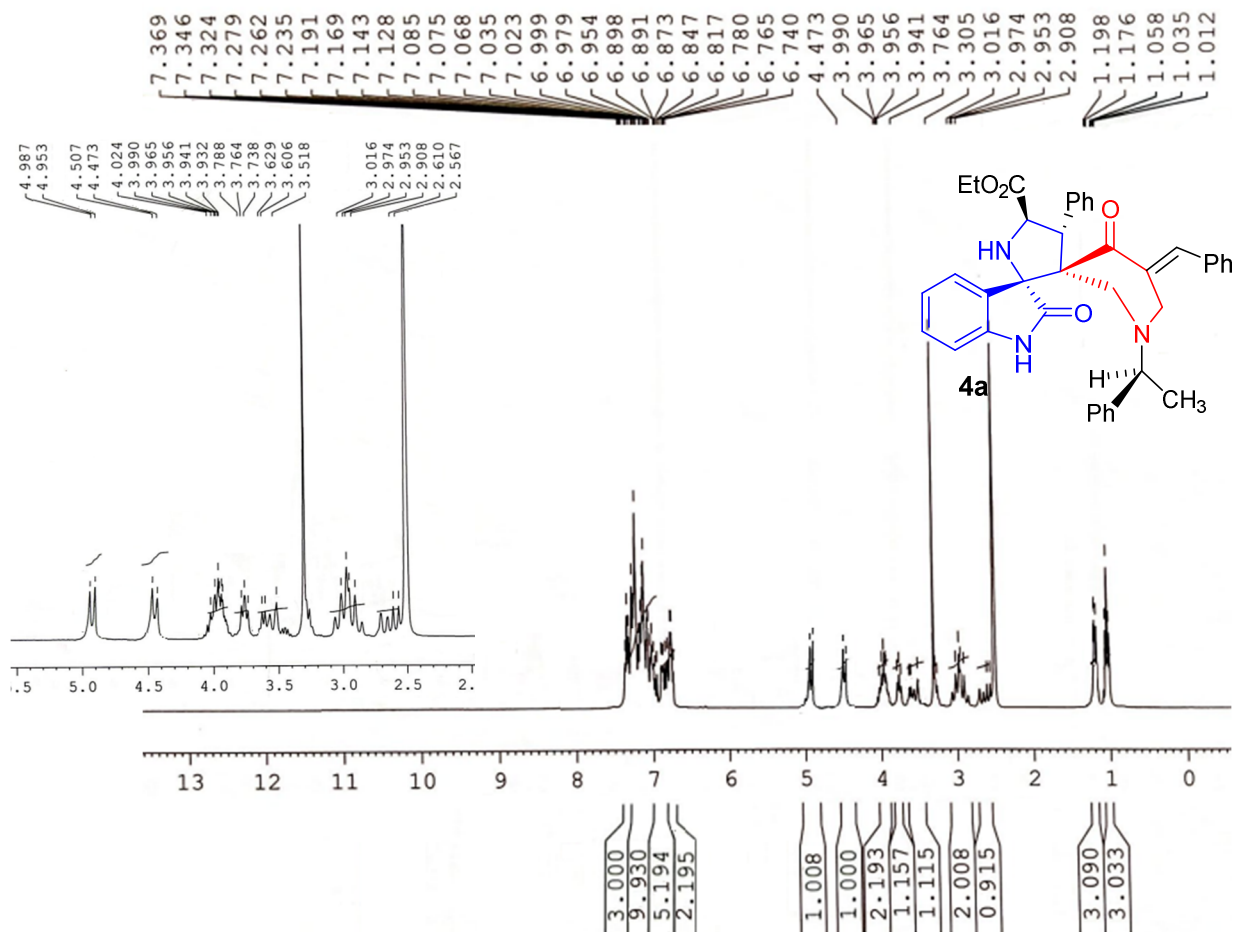

**Figure S13.**  $^1\text{H}$  NMR spectrum of compound **4a** (300 MHz,  $\text{DMSO-}d_6$ )

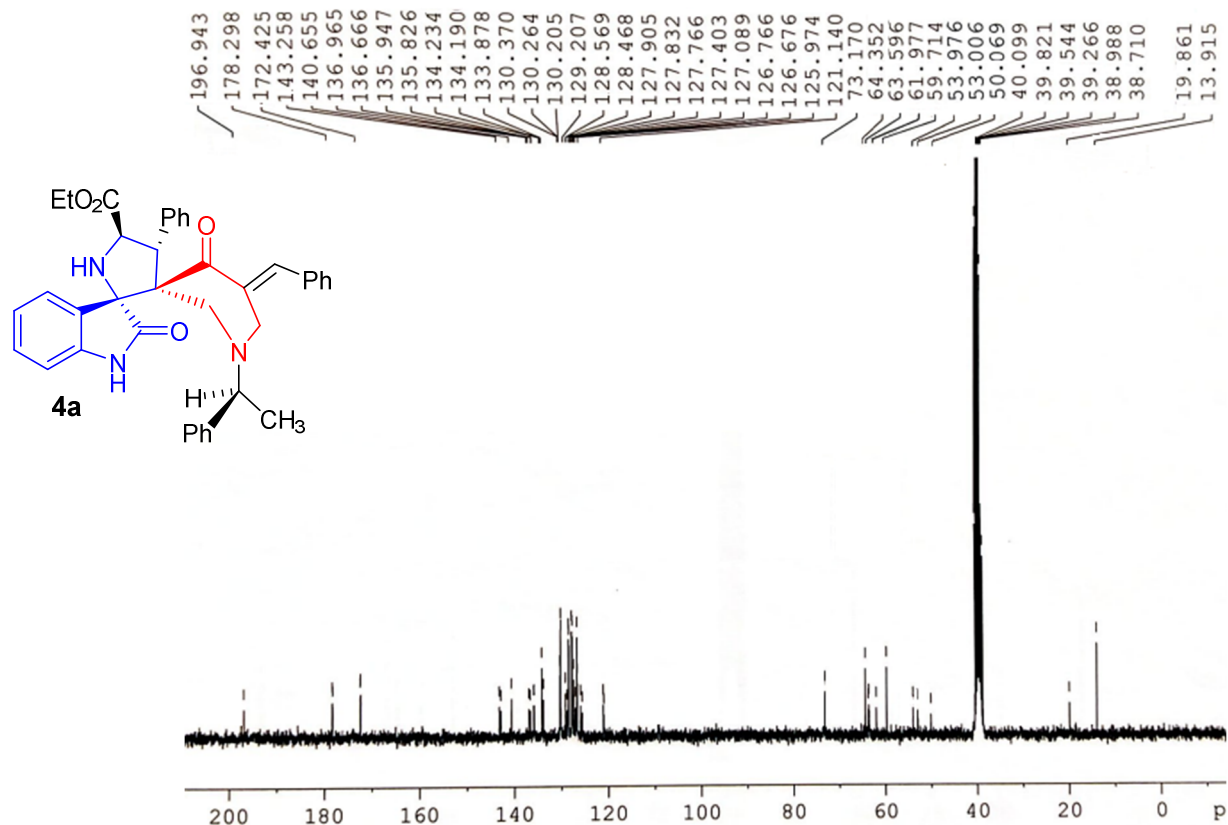

**Figure S14.**  $^{13}\text{C}$   $\{^1\text{H}\}$  NMR spectrum of compound **4a** (75 MHz,  $\text{DMSO-}d_6$ )

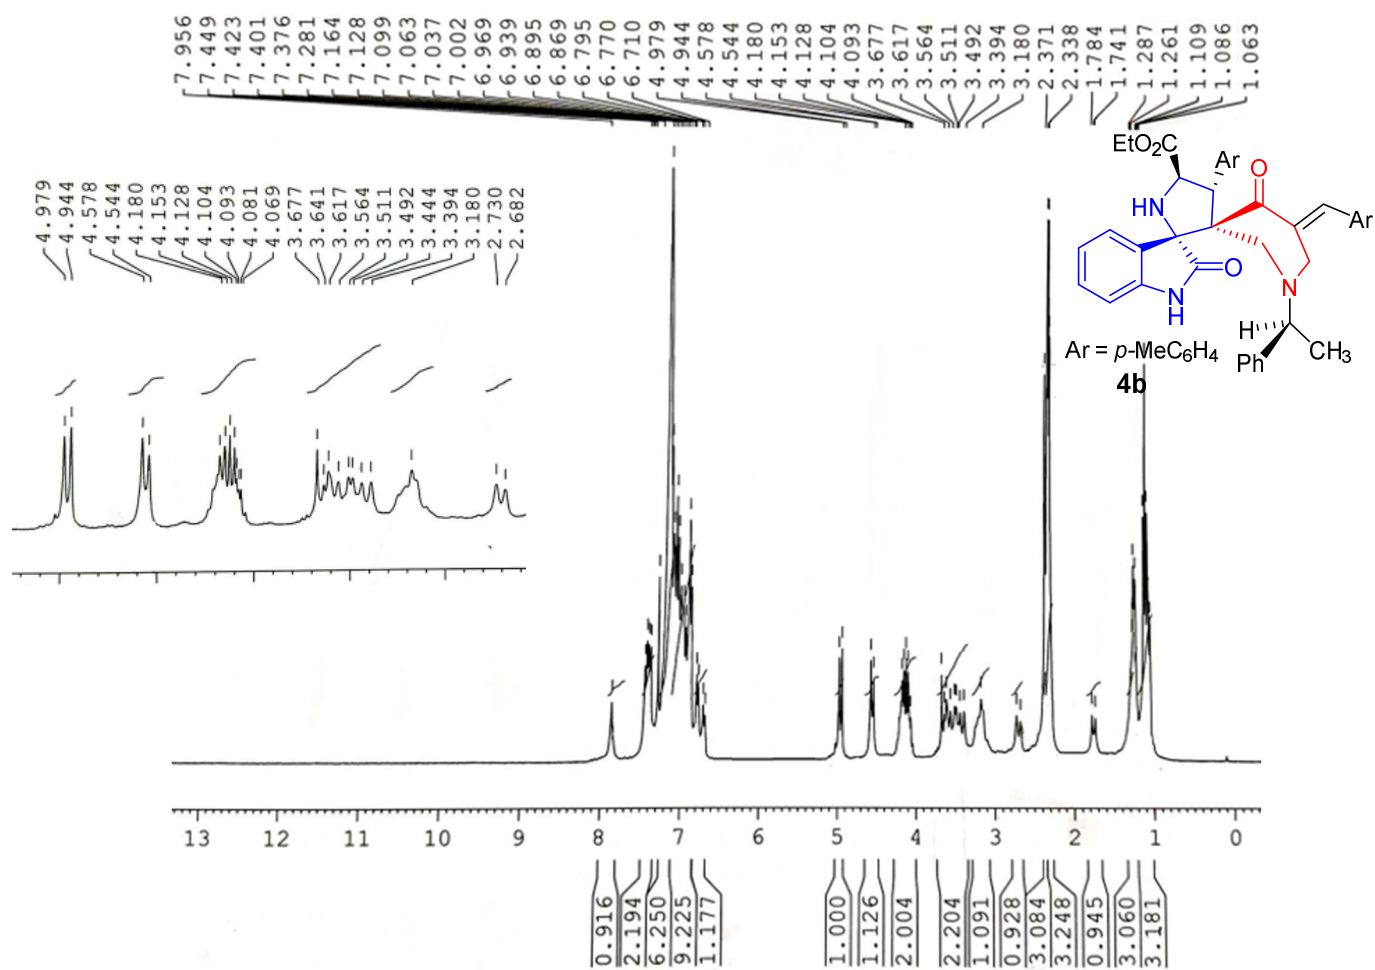

**Figure S15.** <sup>1</sup>H NMR spectrum of compound **4b** (300 MHz, CDCl<sub>3</sub>)

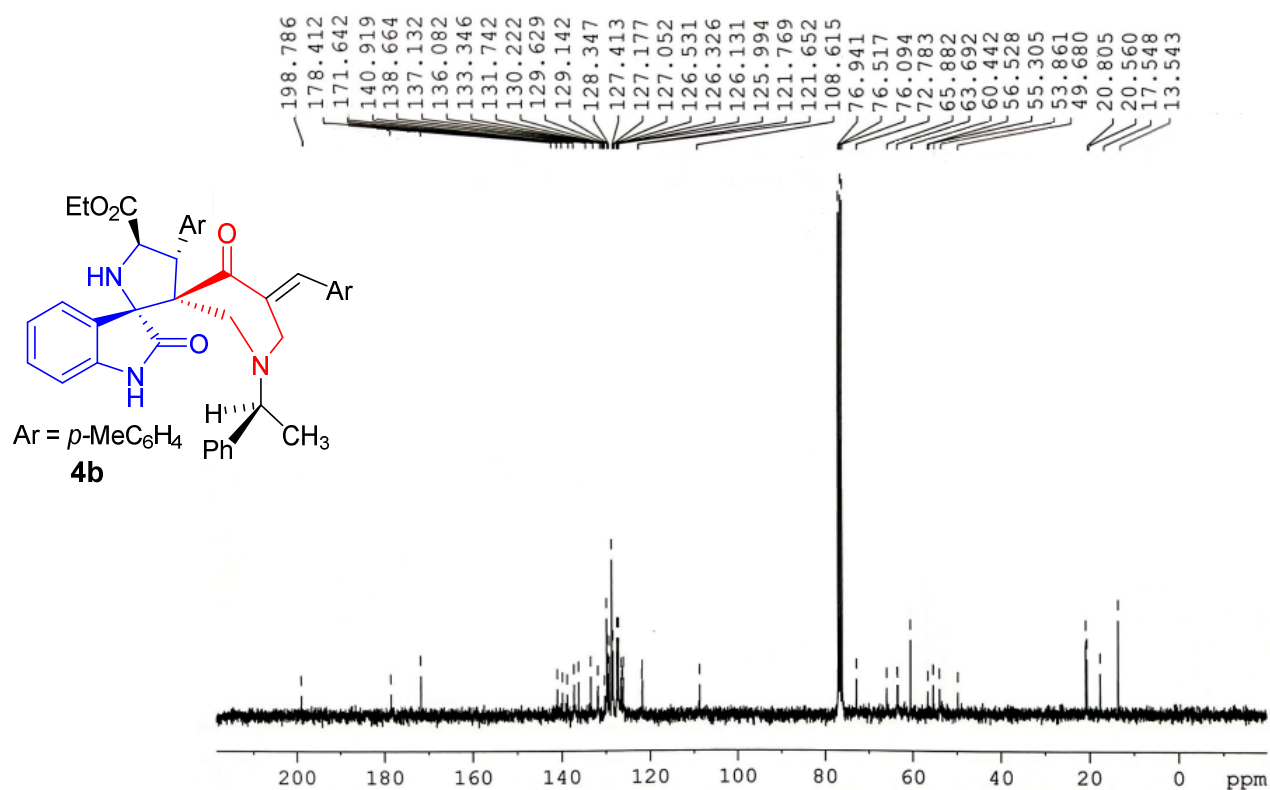

**Figure S16.** <sup>13</sup>C {<sup>1</sup>H} NMR spectrum of compound **4b** (75 MHz, CDCl<sub>3</sub>)

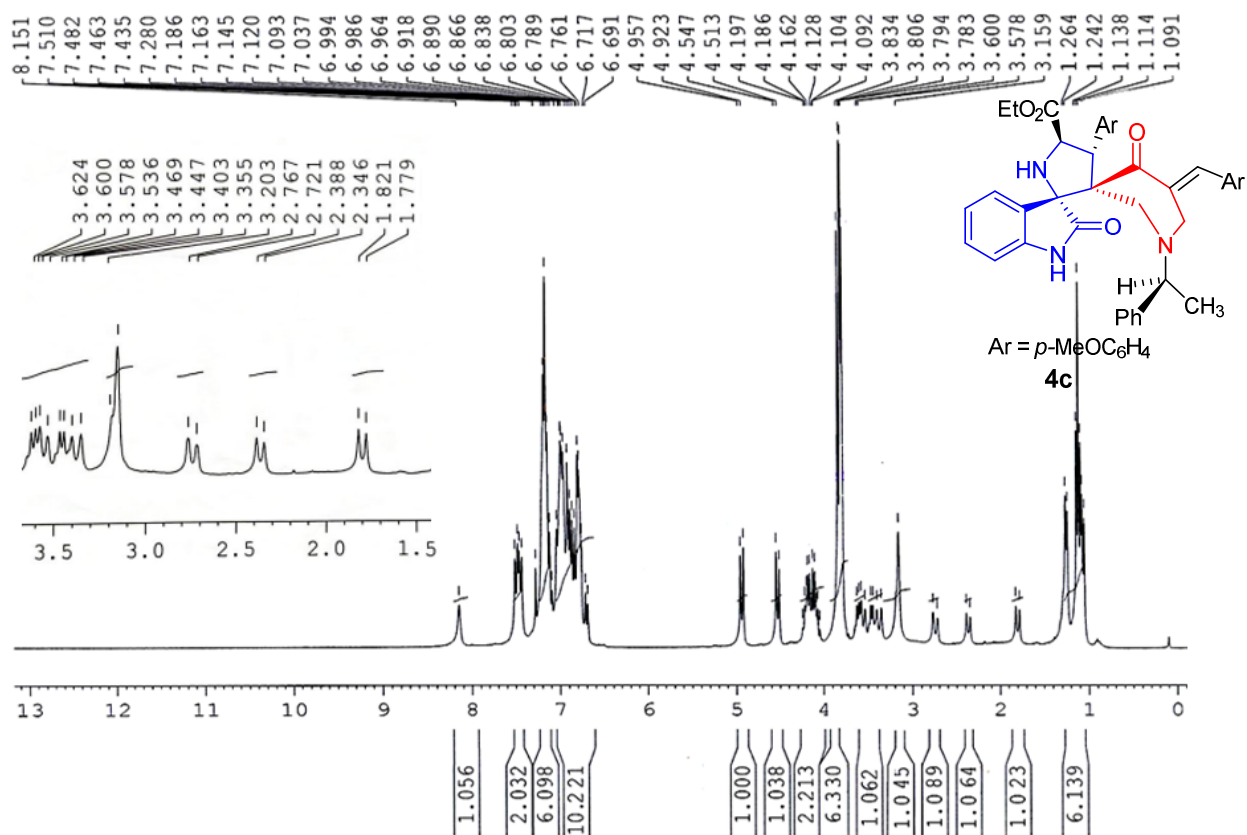

**Figure S17.** <sup>1</sup>H NMR spectrum of compound **4c** (300 MHz, CDCl<sub>3</sub>)



**Figure S19.** DEPT-135 spectrum of compound **4c** (75 MHz, CDCl<sub>3</sub>)

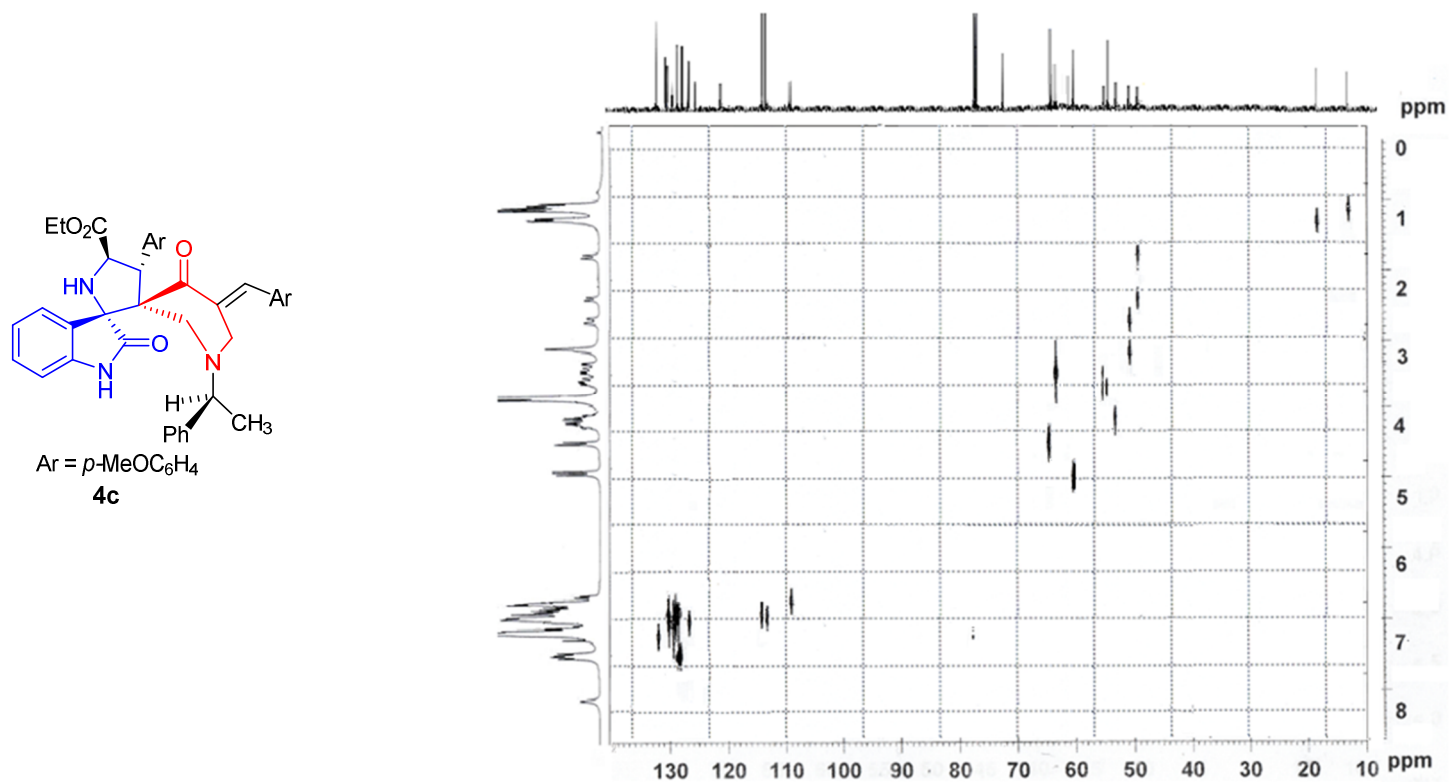

**Figure S20.** HMQC spectrum of compound **4c** (300 MHz, CDCl<sub>3</sub>)

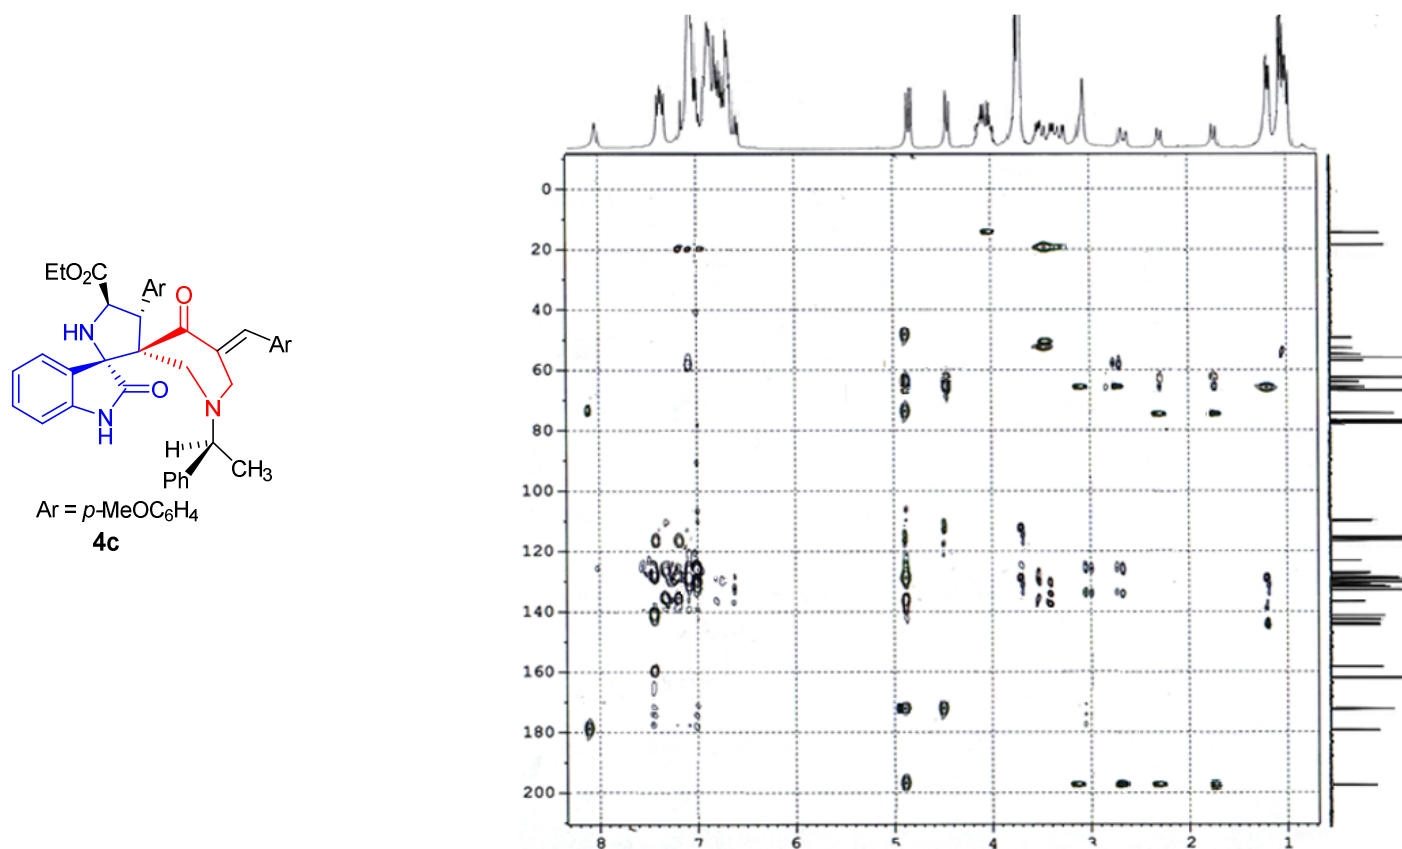

Figure S21. HMBC spectrum of compound **4c** (300 MHz,  $\text{CDCl}_3$ )

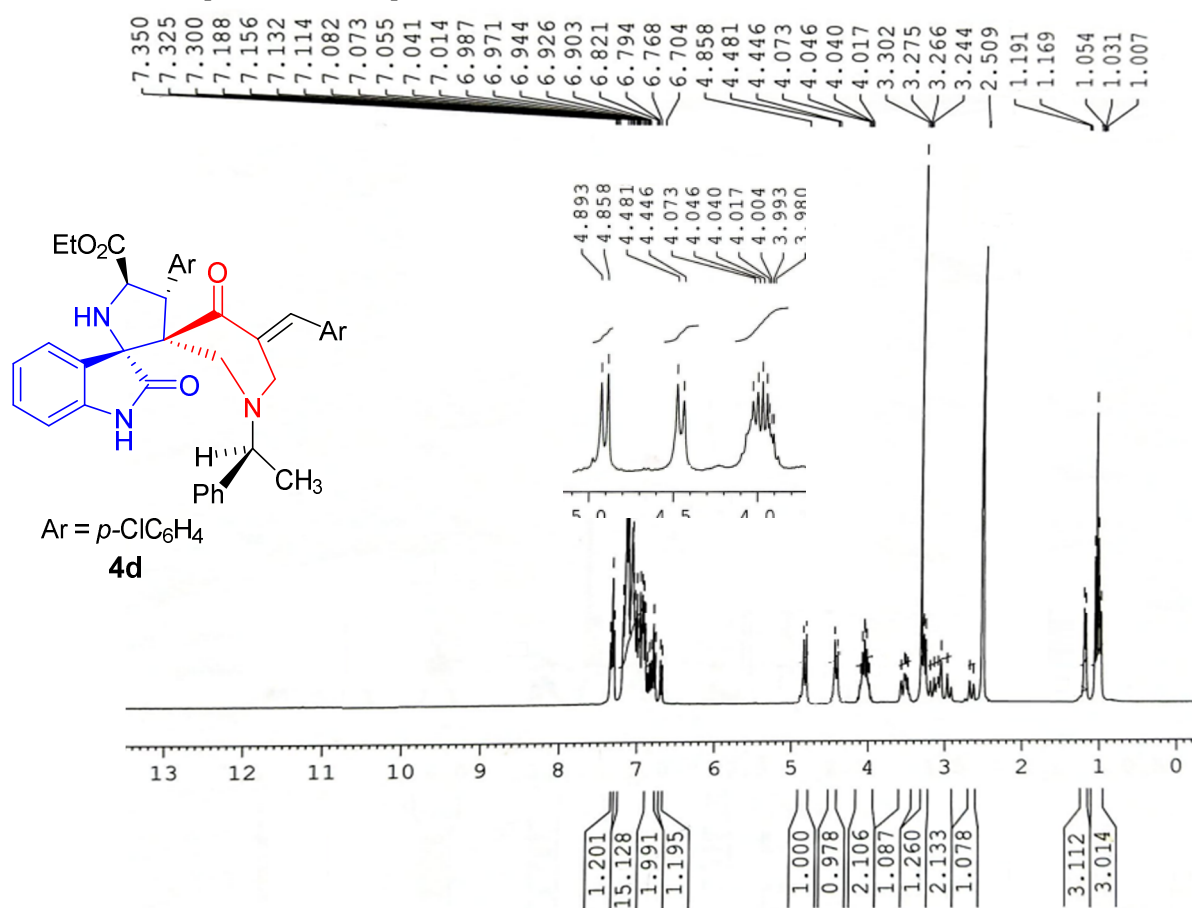

Figure S22.  $^1\text{H}$  NMR spectrum of compound **4d** (300 MHz,  $\text{DMSO}-d_6$ )

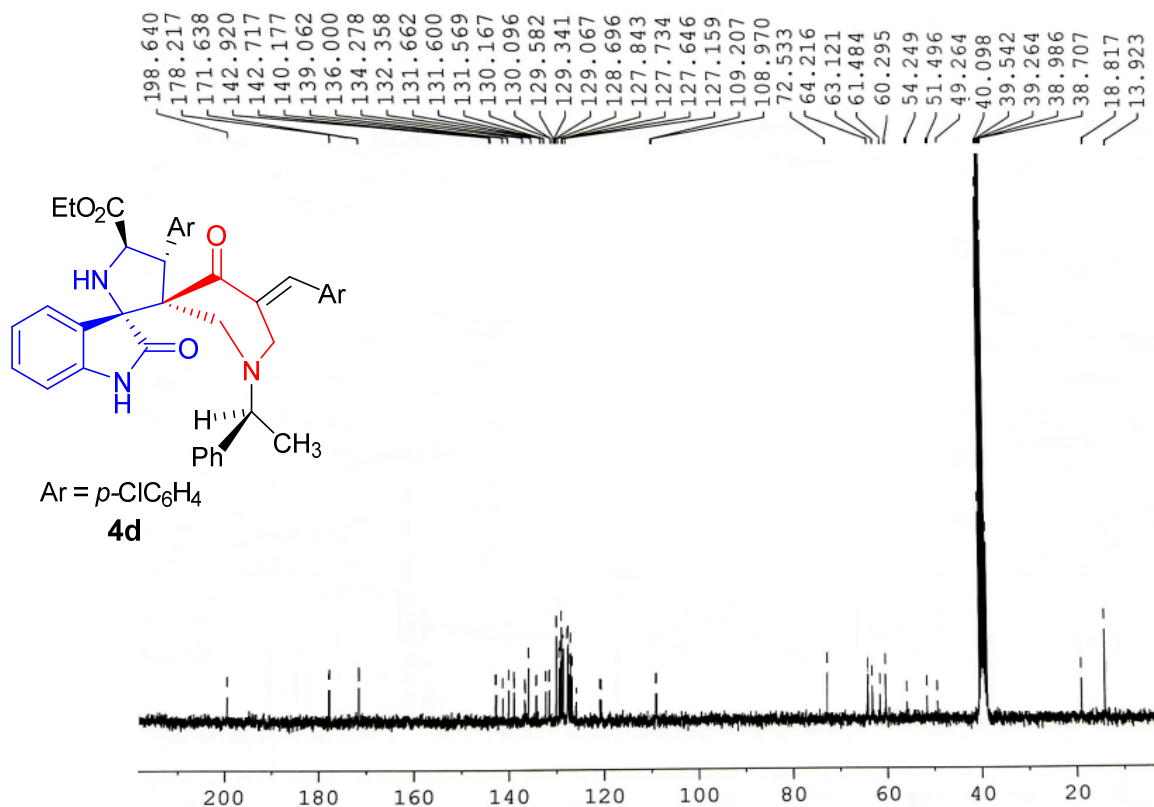

Figure S23.  $^{13}\text{C}$   $\{^1\text{H}\}$  NMR spectrum of compound **4d** (75 MHz,  $\text{DMSO}-d_6$ )

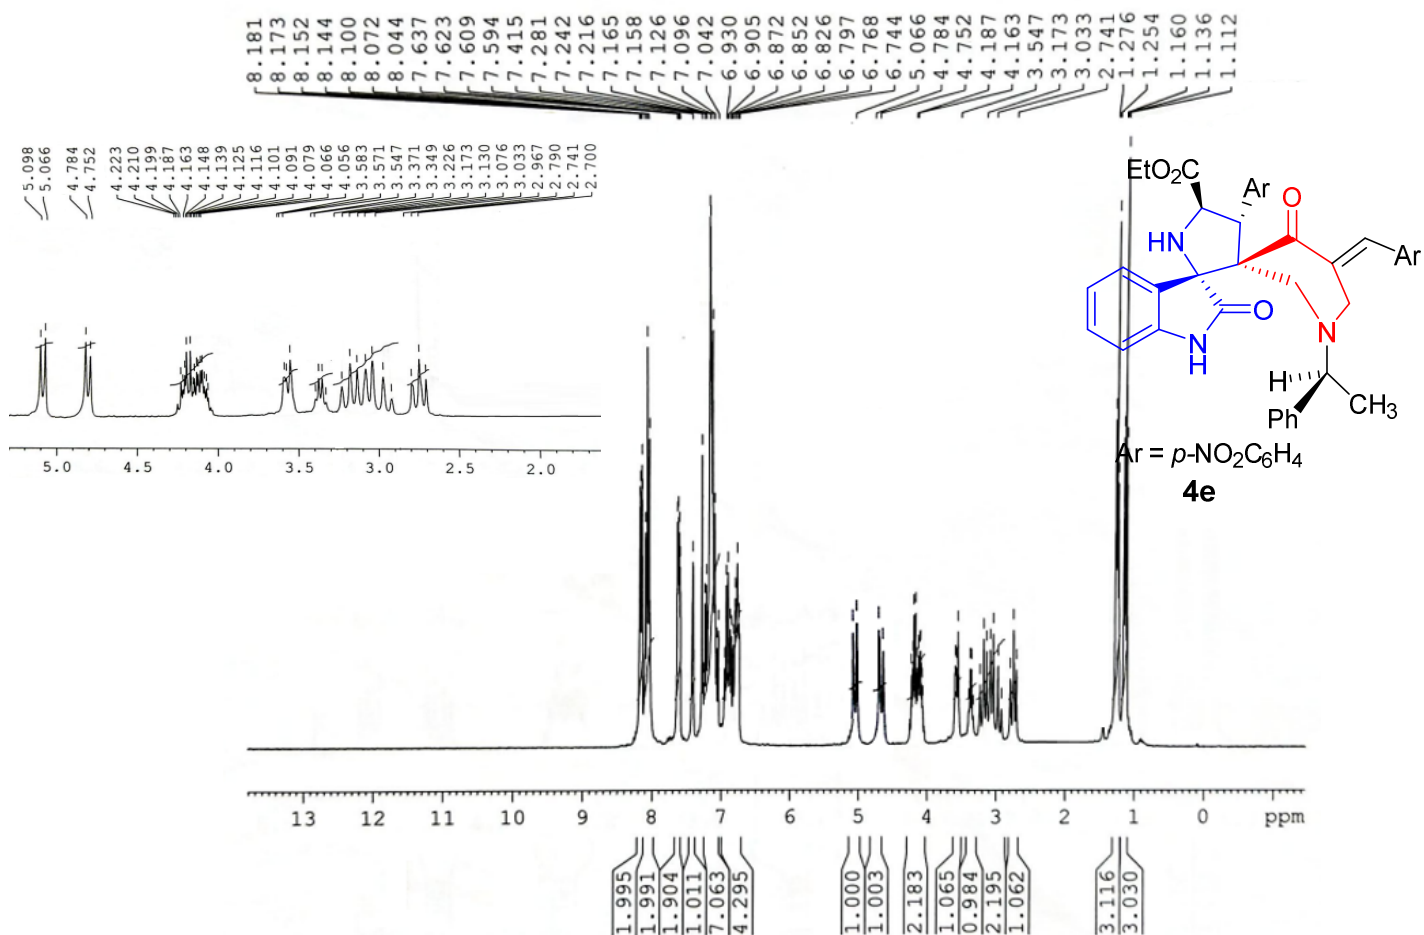

Figure S24.  $^1\text{H}$  NMR spectrum of compound **4e** (300 MHz,  $\text{CDCl}_3$ )

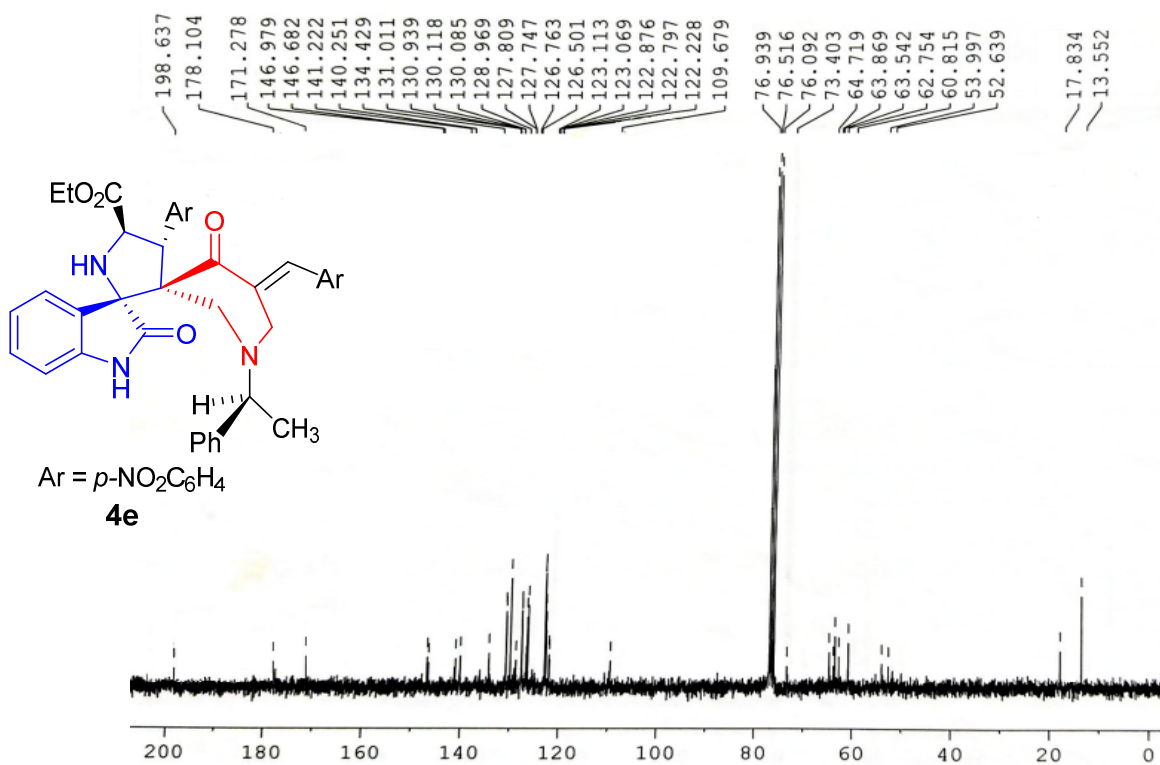

Figure S25.  $^1\text{H}$  NMR spectrum of compound **4e** (300 MHz,  $\text{CDCl}_3$ )

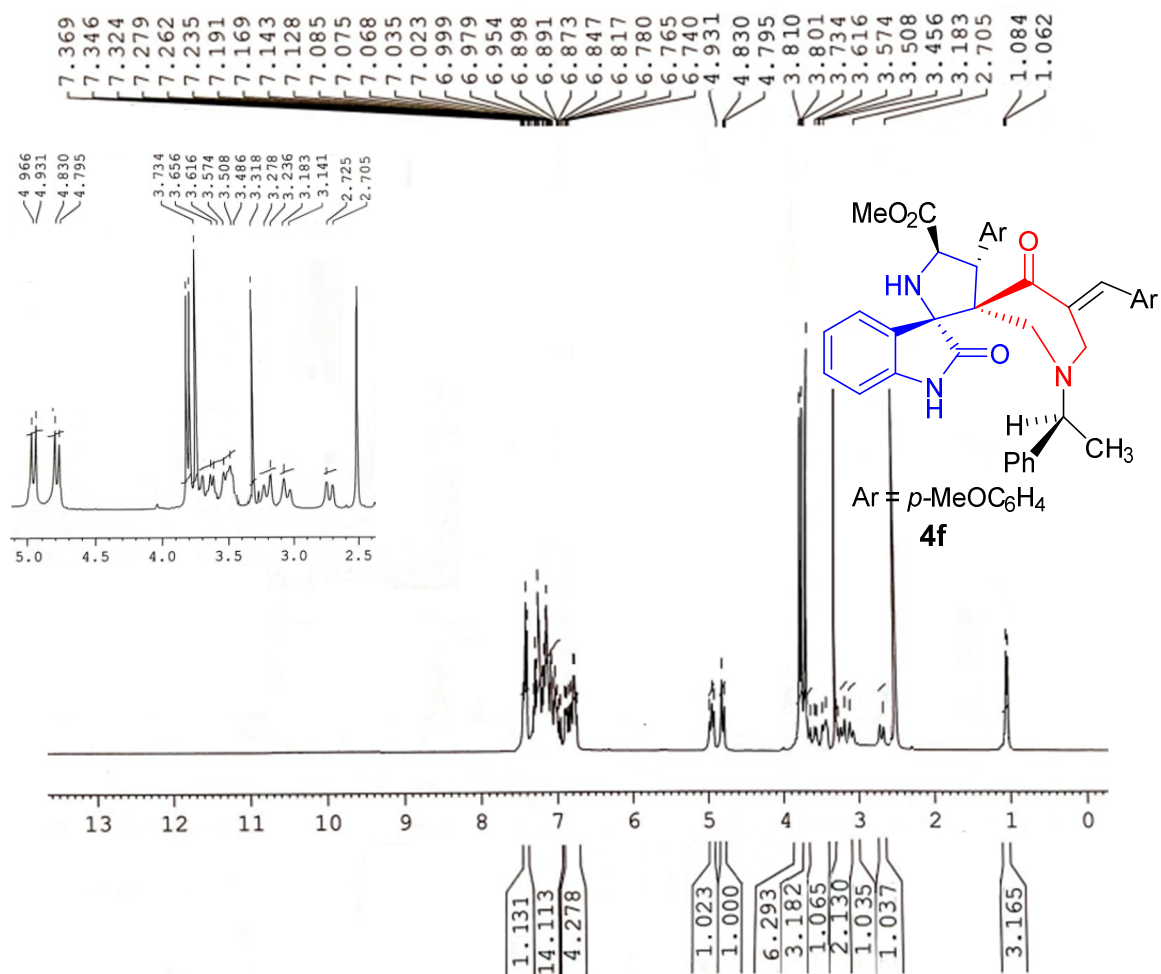

**Figure S26.**  $^1\text{H}$  NMR spectrum of compound **4f** (300 MHz,  $\text{DMSO}-d_6$ )

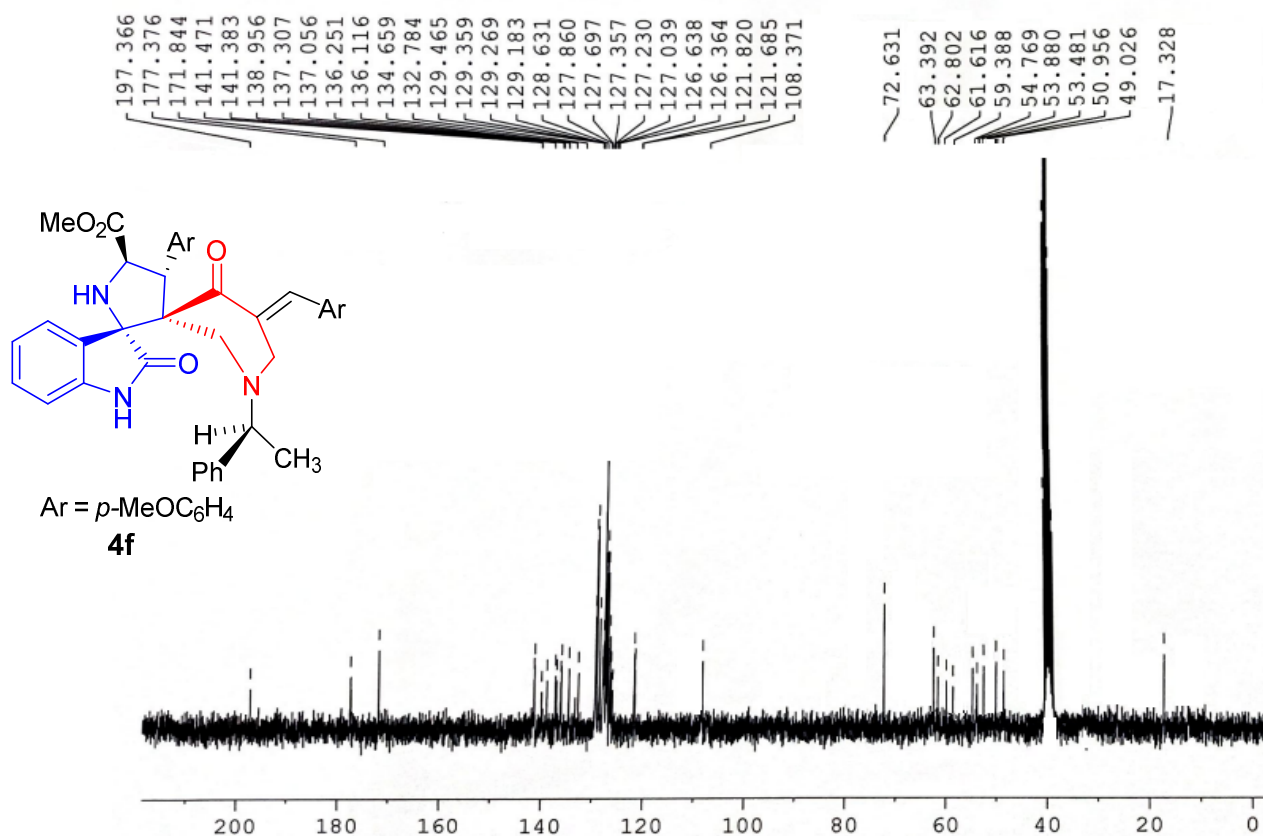

**Figure S27.**  $^{13}\text{C}$   $\{^1\text{H}\}$  NMR spectrum of compound **4f** (75 MHz,  $\text{DMSO}-d_6$ )

**Table S1.** Selected bond lengths (Å) and angles for compound **5c**.

|            |            |             |            |
|------------|------------|-------------|------------|
| C1–N1      | 1.470(2)   | C5–N2       | 1.359(2)   |
| N1–C4      | 1.478(2)   | N2–C6       | 1.393(3)   |
| C1–C2      | 1.553(2)   | C6–C11      | 1.404(3)   |
| C2–C3      | 1.563(2)   | C11–C4      | 1.519(2)   |
| C3–C4      | 1.601(2)   | C3–C12      | 1.532(2)   |
| C4–C5      | 1.564(2)   | C12–O2      | 1.226(2)   |
| C5–O1      | 1.221(2)   | C12–C13     | 1.494(2)   |
| C14–N3     | 1.462(2)   | N3–C15      | 1.456(2)   |
| C13–C31    | 1.355(3)   |             |            |
| C1–N1–C4   | 103.87(14) | C14–N3–C15  | 113.38(14) |
| N1–C1–C2   | 105.65(14) | N3–C15–C3   | 107.79(14) |
| C1–C2–C3   | 103.41(13) | C15–C3–C12  | 106.88(14) |
| C3–C12–C13 | 116.31(15) | C12–C13–C31 | 116.85(16) |
| C13–C14–N3 | 115.37(14) | C13–C31–C32 | 129.99(17) |

**Table S2.** Hydrogen Bonds for **5c**.

| D–H...A                  | d(D–H)/Å | d(H–A)/Å | d(D–A)/Å | D–H–A/°   |
|--------------------------|----------|----------|----------|-----------|
| C1–H1A...O1              | 0.96(2)  | 2.40(2)  | 3.010(2) | 121.0(16) |
| N2–H2...O11 <sup>1</sup> | 0.90(3)  | 1.96(3)  | 2.853(2) | 169(3)    |
| C56–H56A...O7            | 1.00(2)  | 2.40(2)  | 3.026(2) | 120.3(17) |
| N5–H5...O5               | 0.87(3)  | 1.98(3)  | 2.846(2) | 169(3)    |
